# Supplementary material for: Computational insights into the binding modes, keto–enol tautomerization and stereo-electronically controlled decarboxylation of oxaloacetate in the active site of macrophomate synthase
Source: Royal Society of Chemistry journal article supplement (doi:10.1039/d4cp00716f), 2024-01-01
Supplement: d4cp00716f1.pdf [file d4cp00716f1.pdf]

## Supporting Information

### Computational insights into the binding modes, keto-enol tautomerization and stereo-electronically controlled decarboxylation of oxaloacetate in the active site of Macrophomate synthase

Xinyi Li,<sup>†</sup> Fa-Guang Zhang,<sup>‡</sup> Jun-An Ma<sup>‡,\*</sup> and Yongjun Liu<sup>†,\*</sup>

<sup>†</sup> School of Chemistry and Chemical Engineering, Shandong University, Jinan, Shandong 250100, China.

<sup>‡</sup> Department of Chemistry, Tianjin Key Laboratory of Molecular Optoelectronic Sciences, Frontiers Science Center for Synthetic Biology (Ministry of Education), Tianjin University, Tianjin 300072, China.

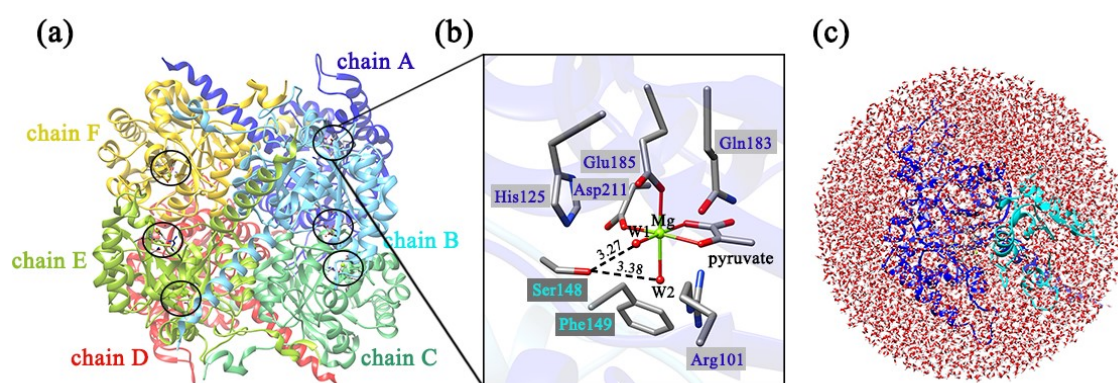

Figure S1. (a) Hexameric crystal structure of MPS (PDB code: 1IZC). (b) Active site of MPS, in which pocket residues His125, Asp211, Glu185, Gln183 and Arg101 are from chain A, while Ser148 and Phe149 are from chain B. (c) Solvated model of pretreatment in this work.

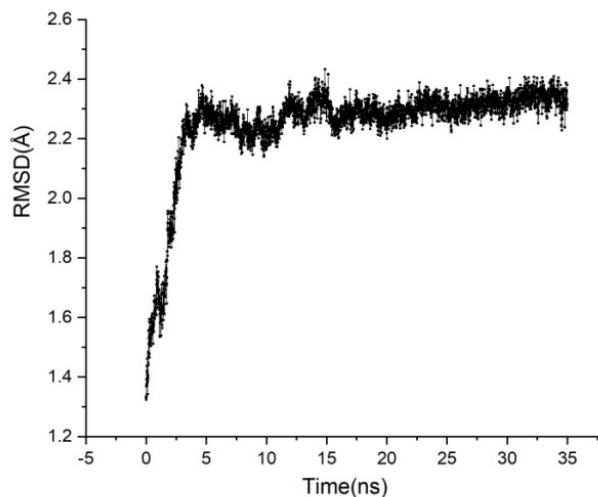

Figure S2. RMSD for the backbone atoms of enzyme-oxaloacetate complex in 35-ns MD simulation.

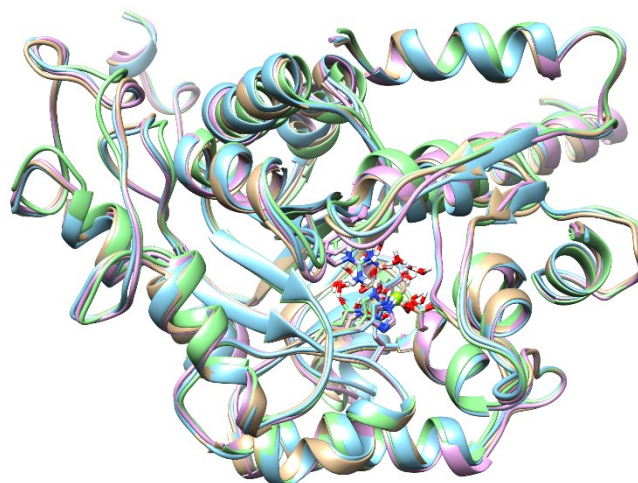

Figure S3. Overlay of four QM/MM-optimized structures which were first derived from snapshots of MD trajectory at 15 (plum), 20 (blue), 25 (tan), 30 (light green) ns and then optimized at B3LYP/B2 level. The structure (shown in blue) at 20 ns is considered to be representative, which was chosen for the QM/MM calculation.

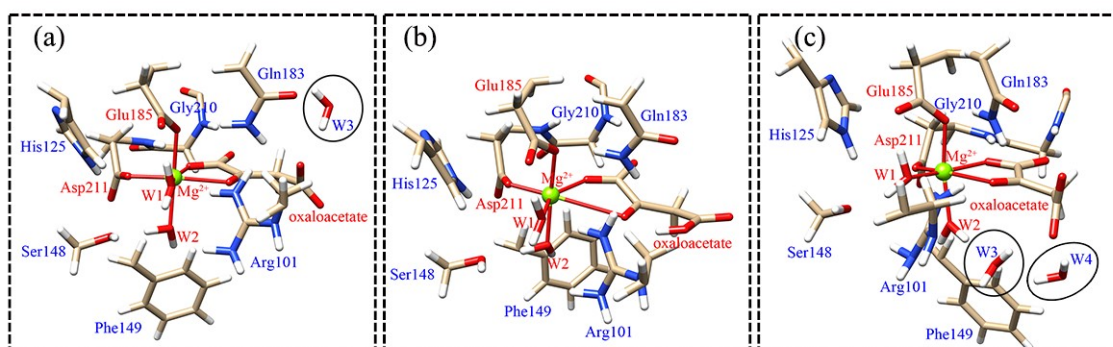

Figure S4. QM regions used for exploring different reactions in this work. (a) QM region for the decarboxylation of the doubly deprotonated oxaloacetate. An additional water

molecule was included in the QM region when the hydration-assisted decarboxylation of OAA was investigated. (b) QM region for the proton migration-assisted decarboxylation of the singly protonated oxaloacetate. (c) QM regions selected for the keto-enol tautomerization of oxaloacetate with the assistance of one or two water molecules.

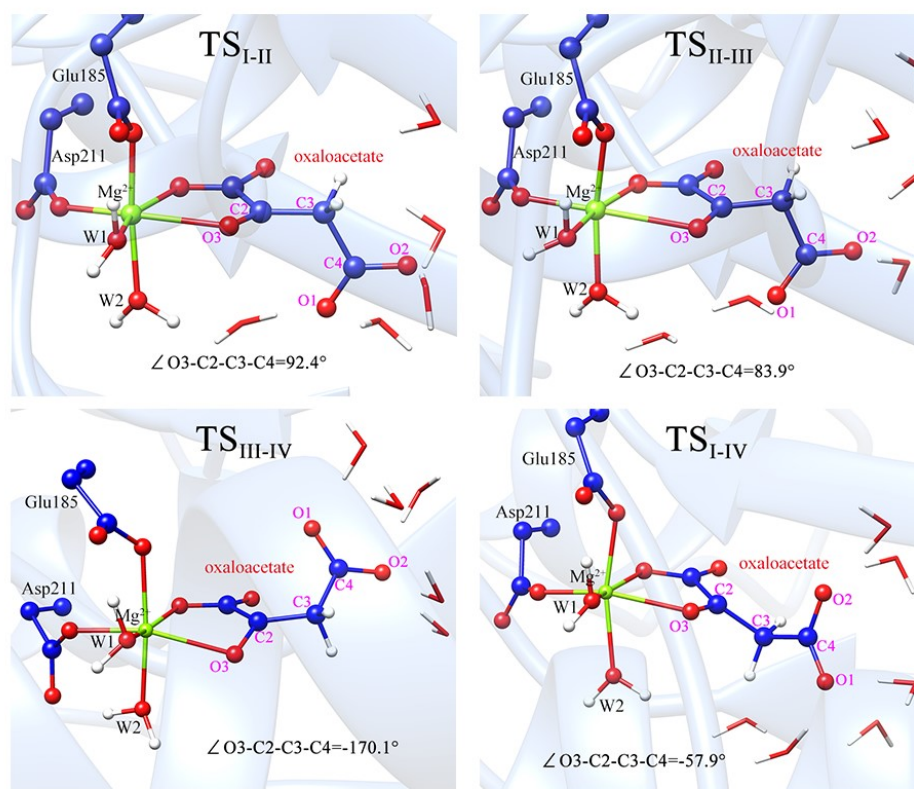

Figure S5. Optimized transition states involved in isomerization of four binding conformations of oxaloacetate from K-I to K-II, K-III and K-IV.

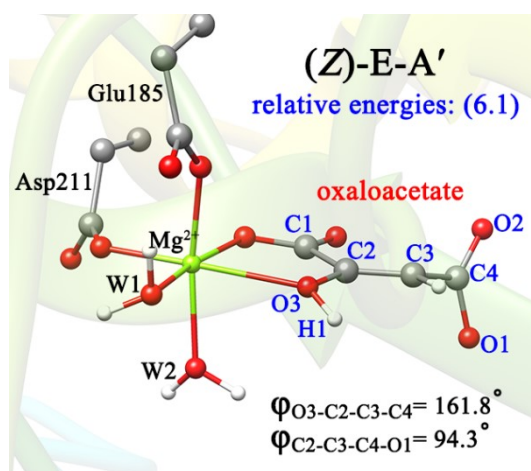

Figure S6. A QM/MM-optimized enolate structure of oxaloacetate binding to the magnesium ion in MPS, which was considered to be dynamically unstable via MD

simulations and easily isomerized into (Z)-E-A. The data in brackets is the QM/MM relative energy when K-I was set to zero in kcal/mol. All distances are present in angstrom.

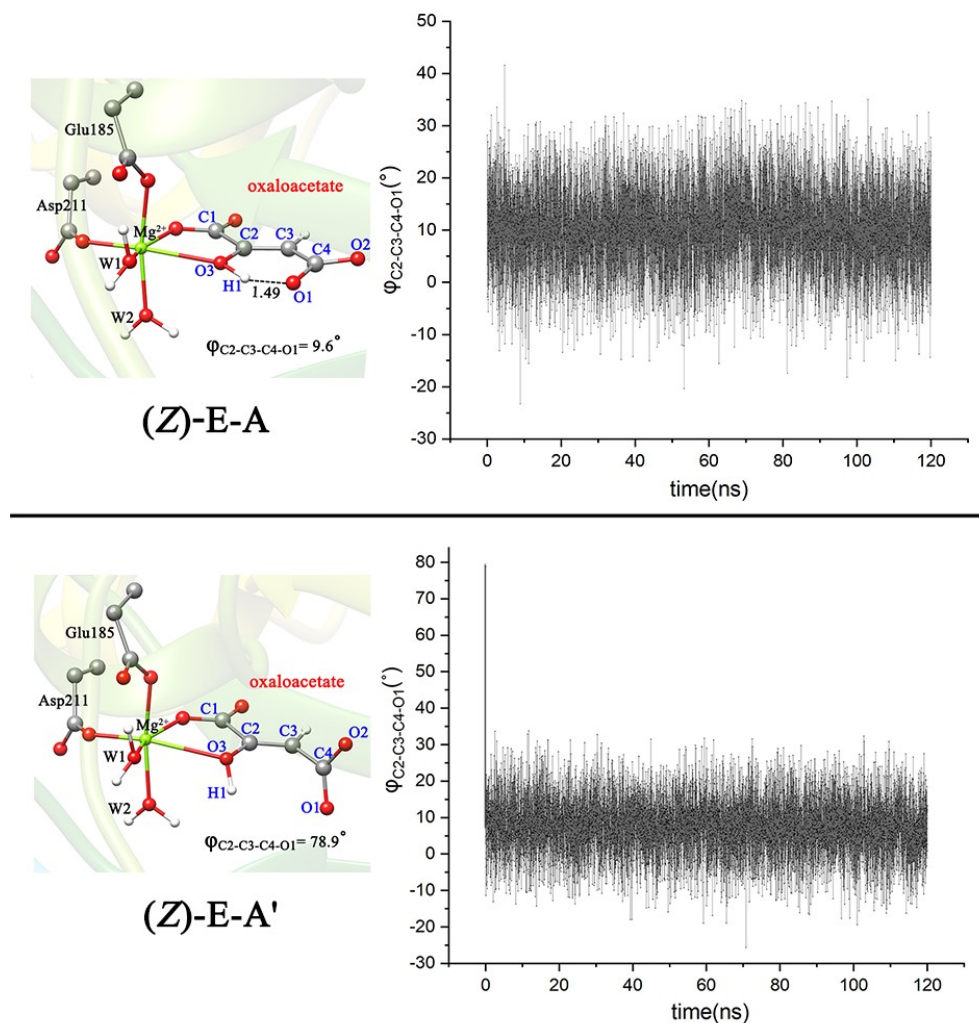

Figure S7. Time evolution of the dihedral of C2-C3-C4-O1 during 120-ns MD simulations of (Z)-E-A (upper panel) and (Z)-E-A' (lower panel). The dihedrals of  $\phi_{O3-C2-C3-C4}$  of (Z)-E-A and (Z)-E-A' all fluctuate around 0 degree and those of  $\phi_{C2-C3-C4-O1}$  all fluctuate around 10 degrees. This indicates that (Z)-E-A' is unstable in MD simulations and can be easily converted into (Z)-E-A, that is, the carboxylate group tends to be parallel to the plane of C=C bond.

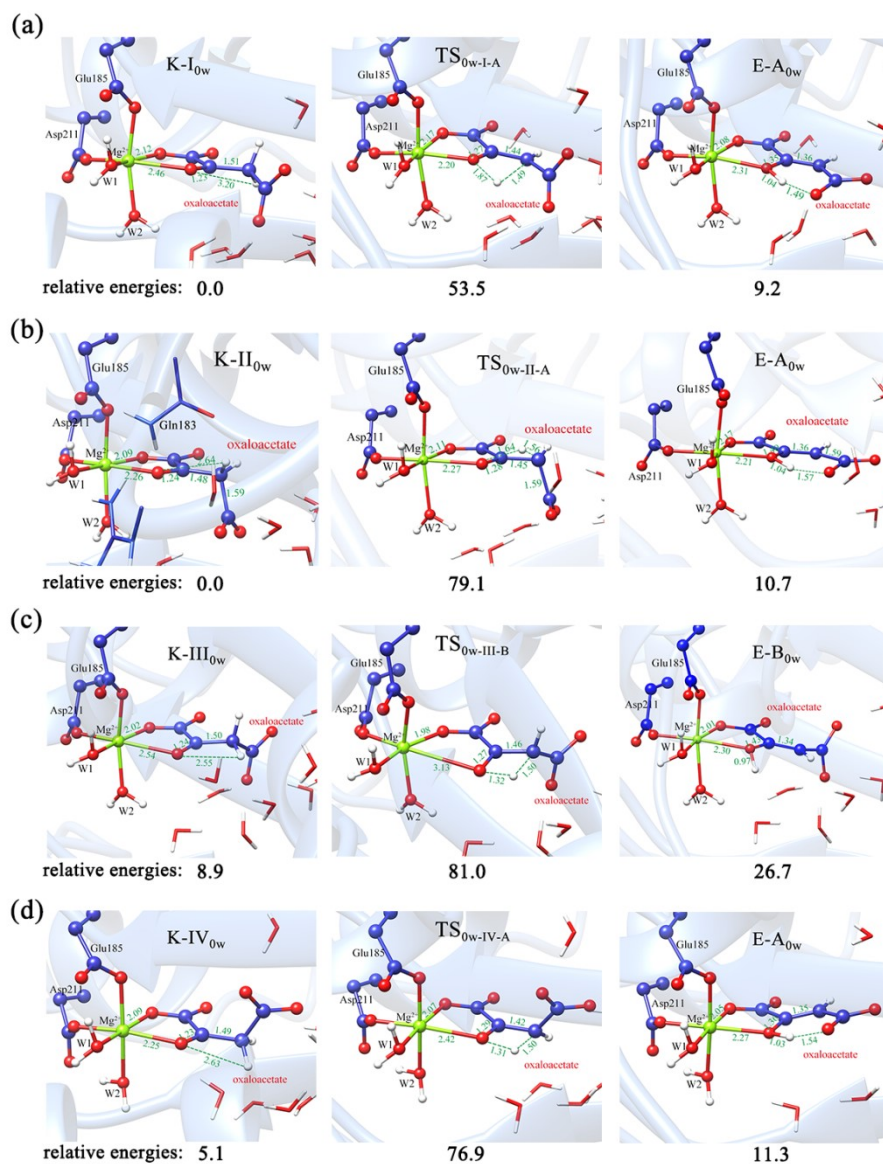

Figure S8. Optimized structures of keto-enol tautomerization without the assistance of water molecule. All distances are given in angstrom and relative energies are in kcal/mol.

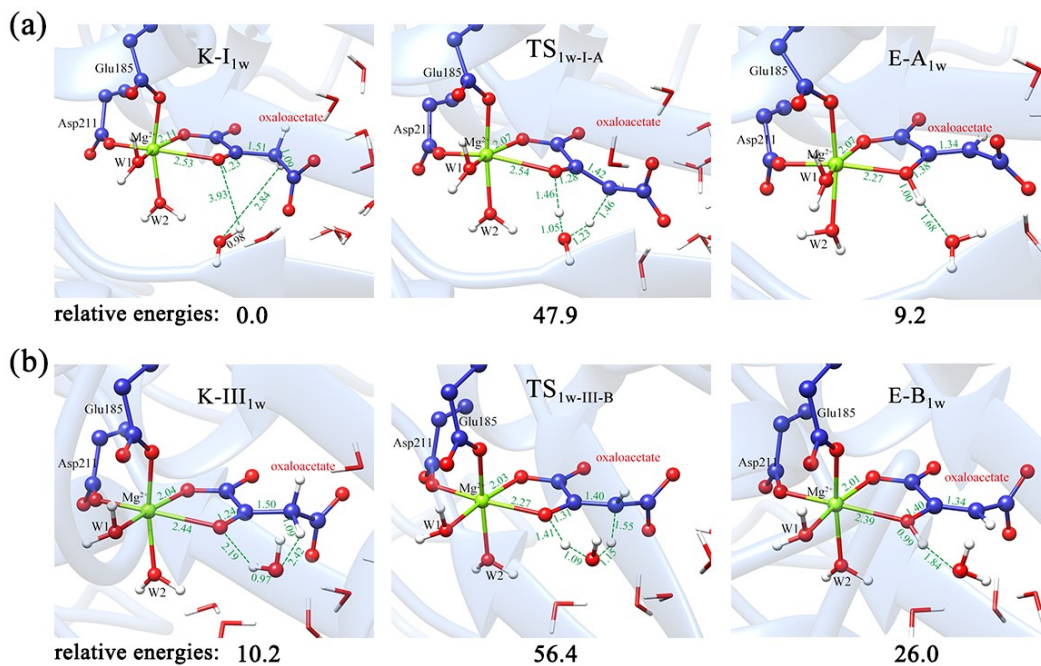

Figure S9. Optimized structures of keto-enol tautomerization of K-I to E-A and K-III to E-B with the assistance of one water molecule. All distances are given in angstrom and relative energies are in kcal/mol.

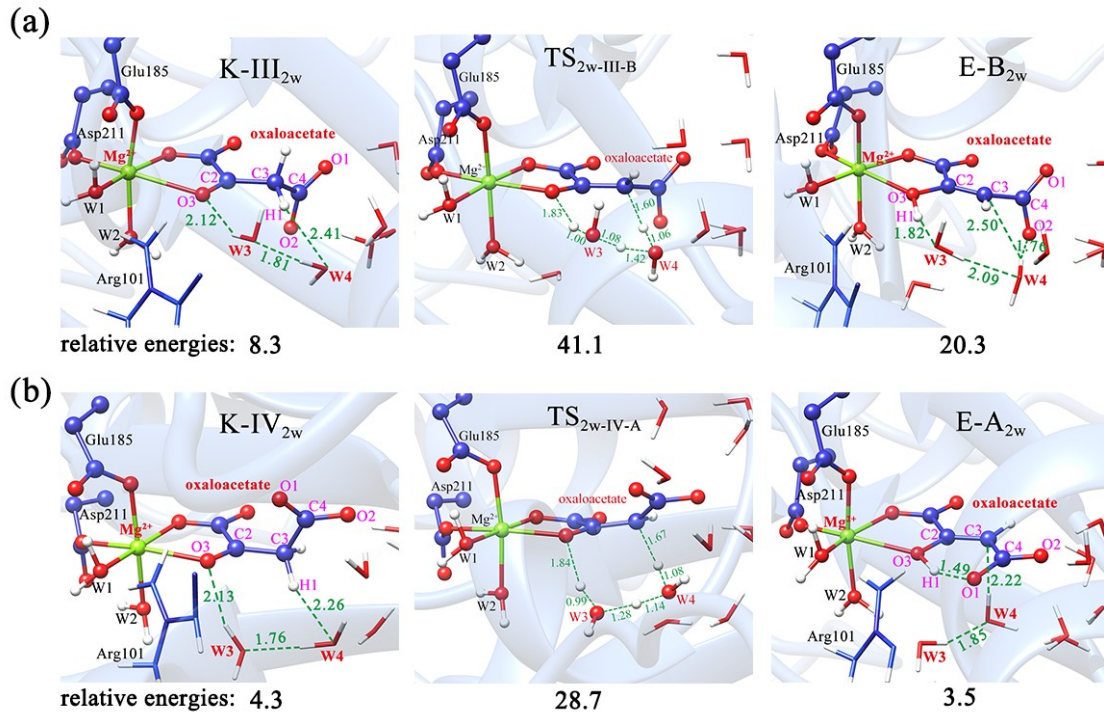

Figure S10. Optimized structures of keto-enol tautomerization of K-III to E-B and K-IV to E-A with the assistance of two water molecules. All distances are given in angstrom and relative energies are in kcal/mol.

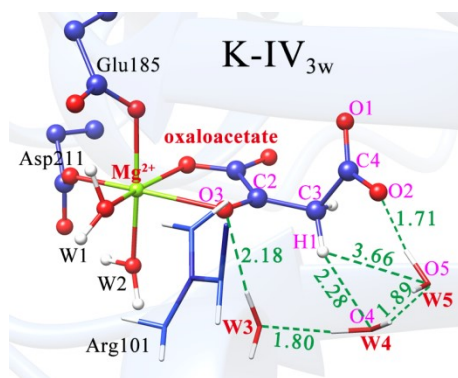

Figure S11. Optimized structures of K-IV in which the QM region contains three mediate water molecules (W3, W4 and W5). All distances are given in angstrom.

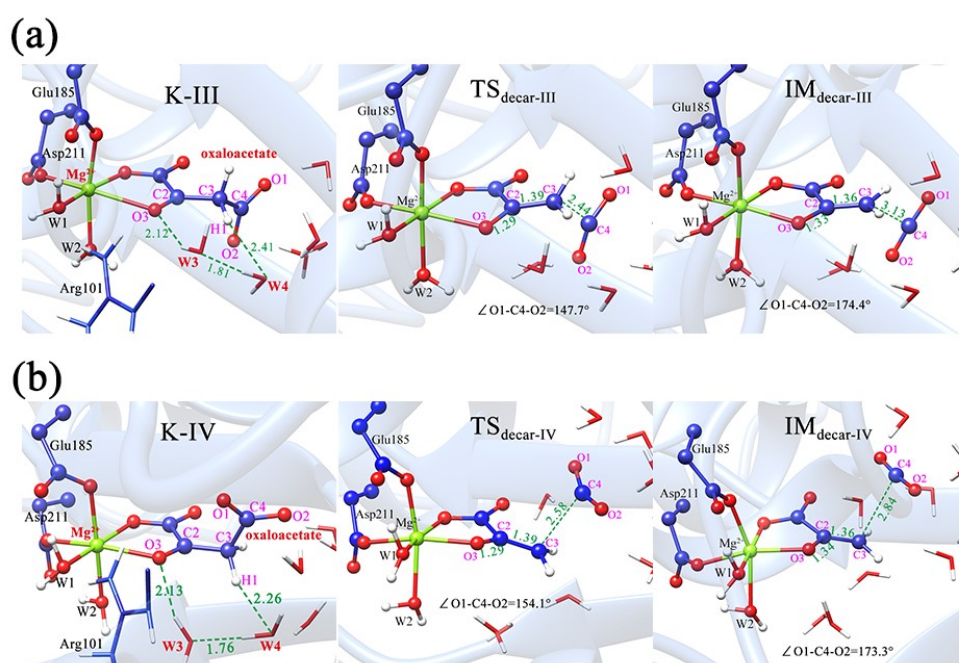

Figure S12. Optimized structures of transition states and intermediates for decarboxylation starting from K-III (a) and K-IV (b). All distances are given in angstrom.

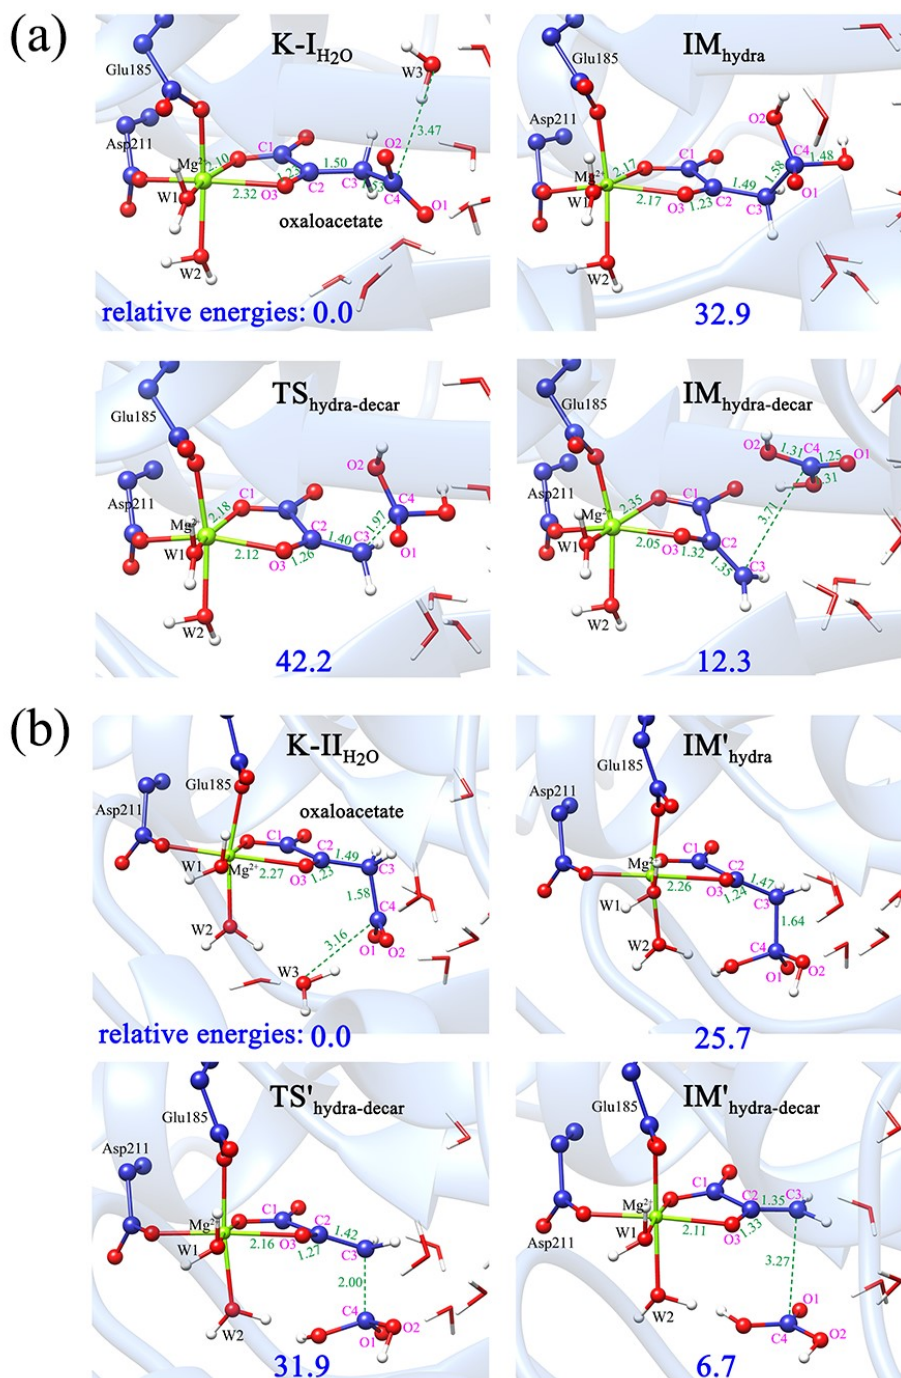

Figure S13. Optimized structures involved in hydration-assisted decarboxylation of oxaloacetate starting from K-I-H<sub>2</sub>O (a) and K-II-H<sub>2</sub>O (b). All distances are given in angstrom and relative energies are in kcal/mol.



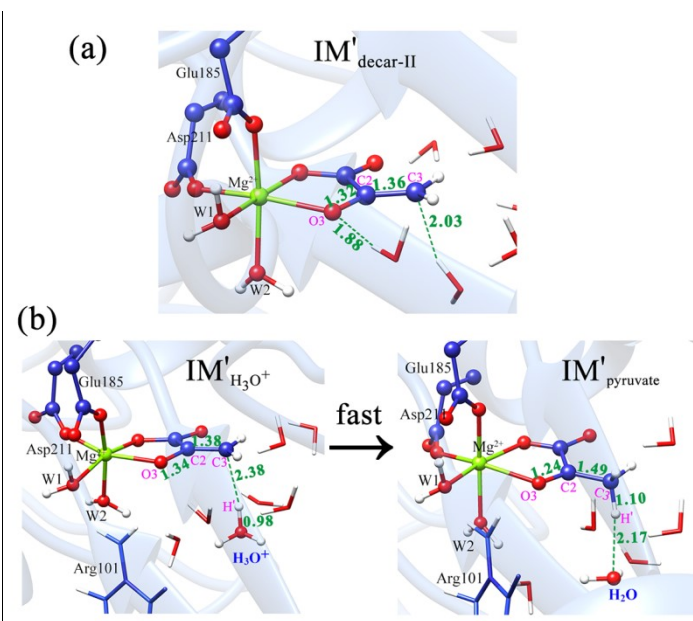

Figure S14. (a) Optimized intermediate structure generated by the decarboxylation of K-II, in which the carbon dioxide has escaped from the active site. (b) Schematic representation of the protonation process of the enolpyruvate intermediate.  $IM1'_{H_3O^+}$  represents the model where a hydrated proton comes from bulk solvent to approach the enolpyruvate, and our optimization indicated that this proton immediately transfers to the enolpyruvate to generate the more stable pyruvate ( $IM'_{\text{pyruvate}}$ ). All distances are given in angstrom.

Cartesian coordinates of QM regions of key transition states and intermediates

|            |        |        |        |    |        |        |        |
|------------|--------|--------|--------|----|--------|--------|--------|
| <b>K-I</b> |        |        |        | H  | 8.378  | 5.905  | 2.537  |
| C          | 9.718  | 5.478  | 0.176  | C  | 6.987  | 7.522  | 2.692  |
| H          | 9.640  | 6.563  | 0.333  | H  | 6.306  | 7.231  | 1.912  |
| H          | 9.728  | 5.304  | -0.909 | C  | 2.428  | 4.184  | 7.210  |
| O          | 8.639  | 4.799  | 0.809  | H  | 3.363  | 4.735  | 7.341  |
| H          | 7.829  | 5.098  | 0.325  | H  | 2.080  | 3.870  | 8.201  |
| C          | 12.520 | 0.653  | 2.336  | C  | 2.599  | 2.923  | 6.397  |
| H          | 13.384 | 1.253  | 2.643  | O  | 1.631  | 2.163  | 6.186  |
| H          | 11.744 | 0.833  | 3.083  | N  | 3.826  | 2.627  | 5.938  |
| C          | 12.882 | -0.824 | 2.268  | H  | 3.923  | 1.780  | 5.392  |
| C          | 14.099 | -1.264 | 1.728  | H  | 4.650  | 3.220  | 6.001  |
| H          | 14.821 | -0.533 | 1.378  | C  | 6.860  | 5.435  | 7.816  |
| C          | 14.379 | -2.626 | 1.615  | H  | 7.803  | 4.912  | 7.655  |
| H          | 15.318 | -2.943 | 1.171  | H  | 6.138  | 4.679  | 8.136  |
| C          | 13.454 | -3.578 | 2.049  | C  | 6.350  | 6.091  | 6.532  |
| H          | 13.662 | -4.639 | 1.932  | H  | 5.423  | 6.655  | 6.692  |
| C          | 11.973 | -1.792 | 2.724  | H  | 7.071  | 6.813  | 6.129  |
| H          | 11.024 | -1.456 | 3.139  | C  | 6.065  | 5.087  | 5.408  |
| C          | 12.253 | -3.155 | 2.619  | O  | 6.513  | 3.886  | 5.520  |
| H          | 11.530 | -3.892 | 2.966  | O  | 5.382  | 5.479  | 4.425  |
| C          | 0.155  | 2.774  | 0.447  | C  | 10.064 | 0.559  | 10.316 |
| H          | 0.710  | 3.342  | -0.307 | O  | 11.161 | 0.714  | 10.871 |
| H          | -0.466 | 3.496  | 0.986  | N  | 9.932  | 0.187  | 9.033  |
| C          | 1.116  | 2.136  | 1.440  | H  | 9.018  | 0.117  | 8.590  |
| H          | 1.560  | 2.915  | 2.065  | C  | 11.100 | -0.026 | 8.191  |
| H          | 0.604  | 1.455  | 2.128  | H  | 10.769 | -0.565 | 7.298  |
| N          | 2.227  | 1.457  | 0.749  | H  | 11.848 | -0.620 | 8.719  |
| H          | 2.100  | 1.199  | -0.244 | C  | 11.783 | 1.290  | 7.798  |
| C          | 3.495  | 1.750  | 1.054  | O  | 12.969 | 1.505  | 8.025  |
| N          | 3.815  | 2.133  | 2.280  | N  | 10.938 | 2.220  | 7.259  |
| H          | 4.742  | 2.524  | 2.496  | H  | 10.003 | 1.934  | 6.979  |
| H          | 3.218  | 1.792  | 3.042  | C  | 11.369 | 3.551  | 6.825  |
| N          | 4.443  | 1.625  | 0.075  | H  | 12.314 | 3.464  | 6.280  |
| H          | 5.137  | 2.411  | 0.083  | C  | 10.311 | 4.194  | 5.927  |
| H          | 3.996  | 1.530  | -0.844 | H  | 9.313  | 4.134  | 6.369  |
| C          | 5.982  | 9.692  | 3.728  | H  | 10.532 | 5.258  | 5.783  |
| H          | 5.503  | 9.935  | 2.776  | C  | 10.267 | 3.592  | 4.508  |
| H          | 6.482  | 10.586 | 4.108  | O  | 11.317 | 3.166  | 3.997  |
| N          | 8.089  | 8.493  | 4.394  | O  | 9.134  | 3.628  | 3.911  |
| C          | 6.984  | 8.583  | 3.566  | Mg | 7.464  | 2.683  | 4.096  |
| C          | 8.726  | 7.389  | 4.037  | C  | 7.564  | 0.472  | 6.154  |
| H          | 9.639  | 7.022  | 4.478  | O  | 5.766  | 0.879  | 4.615  |
| N          | 8.097  | 6.769  | 3.004  | O  | 7.895  | -0.259 | 7.114  |

|             |        |        |        |   |        |        |        |
|-------------|--------|--------|--------|---|--------|--------|--------|
| C           | 6.213  | 0.122  | 5.468  | C | 1.335  | 2.337  | 1.428  |
| O           | 8.154  | 1.480  | 5.691  | H | 1.762  | 3.198  | 1.951  |
| C           | 5.524  | -1.132 | 5.948  | H | 0.926  | 1.683  | 2.206  |
| H           | 6.263  | -1.937 | 5.869  | N | 2.418  | 1.666  | 0.704  |
| H           | 5.319  | -1.006 | 7.017  | H | 2.209  | 1.266  | -0.226 |
| C           | 4.252  | -1.508 | 5.190  | C | 3.707  | 1.991  | 0.837  |
| O           | 4.390  | -2.042 | 4.048  | N | 4.167  | 2.642  | 1.896  |
| O           | 3.137  | -1.285 | 5.743  | H | 5.126  | 3.005  | 1.946  |
| O           | 6.138  | 3.622  | 2.738  | H | 3.565  | 2.831  | 2.684  |
| H           | 5.754  | 4.416  | 3.238  | N | 4.573  | 1.611  | -0.149 |
| H           | 6.229  | 3.834  | 1.780  | H | 5.252  | 2.393  | -0.340 |
| O           | 7.826  | 1.214  | 2.658  | H | 4.053  | 1.342  | -0.997 |
| H           | 8.637  | 1.098  | 2.128  | C | 6.038  | 9.698  | 3.785  |
| H           | 7.263  | 0.426  | 2.483  | H | 5.610  | 9.840  | 2.791  |
| O           | 6.302  | -1.037 | 2.186  | H | 6.473  | 10.641 | 4.124  |
| H           | 5.965  | -1.118 | 1.262  | N | 8.155  | 8.730  | 4.698  |
| H           | 5.520  | -1.164 | 2.763  | C | 7.106  | 8.639  | 3.798  |
| O           | 6.926  | -3.232 | 3.715  | C | 8.866  | 7.629  | 4.550  |
| H           | 7.046  | -2.626 | 2.961  | H | 9.762  | 7.379  | 5.094  |
| H           | 6.006  | -3.008 | 3.960  | N | 8.349  | 6.831  | 3.578  |
| <b>K-II</b> |        |        |        | H | 8.674  | 5.886  | 3.382  |
| C           | 9.489  | 5.441  | 0.320  | C | 7.222  | 7.466  | 3.086  |
| H           | 9.342  | 6.478  | 0.649  | H | 6.628  | 7.045  | 2.292  |
| H           | 9.557  | 5.450  | -0.774 | C | 2.467  | 4.026  | 6.956  |
| O           | 8.389  | 4.620  | 0.728  | H | 3.340  | 4.651  | 7.172  |
| H           | 7.669  | 4.838  | 0.083  | H | 2.117  | 3.582  | 7.890  |
| C           | 12.588 | 0.676  | 2.343  | C | 2.871  | 2.881  | 6.042  |
| H           | 13.399 | 1.352  | 2.632  | O | 2.493  | 1.716  | 6.265  |
| H           | 11.828 | 0.764  | 3.124  | N | 3.671  | 3.162  | 4.985  |
| C           | 13.087 | -0.758 | 2.226  | H | 4.200  | 2.364  | 4.638  |
| C           | 14.246 | -1.072 | 1.503  | H | 4.157  | 4.066  | 4.906  |
| H           | 14.830 | -0.274 | 1.060  | C | 6.877  | 5.558  | 7.982  |
| C           | 14.642 | -2.397 | 1.328  | H | 7.822  | 5.038  | 7.833  |
| H           | 15.531 | -2.614 | 0.745  | H | 6.150  | 4.804  | 8.297  |
| C           | 13.888 | -3.437 | 1.874  | C | 6.371  | 6.204  | 6.691  |
| H           | 14.178 | -4.470 | 1.700  | H | 5.414  | 6.722  | 6.823  |
| C           | 12.367 | -1.809 | 2.813  | H | 7.074  | 6.956  | 6.312  |
| H           | 11.485 | -1.585 | 3.406  | C | 6.172  | 5.177  | 5.579  |
| C           | 12.758 | -3.138 | 2.636  | O | 6.827  | 4.095  | 5.621  |
| H           | 12.171 | -3.936 | 3.084  | O | 5.333  | 5.458  | 4.653  |
| C           | 0.267  | 2.861  | 0.470  | C | 10.035 | 0.626  | 10.383 |
| H           | 0.747  | 3.450  | -0.318 | O | 11.126 | 0.765  | 10.953 |
| H           | -0.379 | 3.552  | 1.022  | N | 9.913  | 0.265  | 9.095  |
|             |        |        |        | H | 9.003  | 0.209  | 8.643  |

|              |        |        |        |   |        |        |        |
|--------------|--------|--------|--------|---|--------|--------|--------|
| C            | 11.082 | 0.032  | 8.259  | C | 14.224 | -1.086 | 1.474  |
| H            | 10.745 | -0.500 | 7.364  | H | 14.771 | -0.293 | 0.978  |
| H            | 11.817 | -0.575 | 8.790  | C | 14.626 | -2.409 | 1.308  |
| C            | 11.788 | 1.337  | 7.872  | H | 15.485 | -2.630 | 0.682  |
| O            | 12.970 | 1.545  | 8.135  | C | 13.916 | -3.445 | 1.917  |
| N            | 10.969 | 2.276  | 7.304  | H | 14.208 | -4.479 | 1.749  |
| H            | 10.056 | 1.988  | 6.957  | C | 12.432 | -1.812 | 2.904  |
| C            | 11.443 | 3.594  | 6.879  | H | 11.588 | -1.583 | 3.550  |
| H            | 12.397 | 3.485  | 6.355  | C | 12.827 | -3.141 | 2.734  |
| C            | 10.424 | 4.284  | 5.969  | H | 12.276 | -3.934 | 3.234  |
| H            | 9.418  | 4.277  | 6.398  | C | 0.277  | 2.747  | 0.531  |
| H            | 10.699 | 5.337  | 5.825  | H | 0.752  | 3.384  | -0.224 |
| C            | 10.361 | 3.692  | 4.551  | H | -0.358 | 3.403  | 1.134  |
| O            | 11.357 | 3.136  | 4.066  | C | 1.354  | 2.142  | 1.434  |
| O            | 9.249  | 3.863  | 3.916  | H | 1.742  | 2.939  | 2.074  |
| Mg           | 7.614  | 2.807  | 4.208  | H | 0.969  | 1.371  | 2.108  |
| C            | 7.643  | 0.661  | 6.199  | N | 2.464  | 1.606  | 0.648  |
| O            | 5.944  | 1.356  | 4.670  | H | 2.262  | 1.216  | -0.289 |
| O            | 7.884  | -0.092 | 7.164  | C | 3.740  | 1.967  | 0.785  |
| C            | 6.240  | 0.533  | 5.545  | N | 4.190  | 2.633  | 1.840  |
| O            | 8.365  | 1.578  | 5.717  | H | 5.144  | 3.013  | 1.882  |
| C            | 5.332  | -0.549 | 6.001  | H | 3.571  | 2.861  | 2.601  |
| H            | 5.682  | -0.953 | 6.949  | N | 4.621  | 1.600  | -0.193 |
| H            | 4.313  | -0.162 | 6.077  | H | 5.289  | 2.392  | -0.382 |
| C            | 5.333  | -1.703 | 4.908  | H | 4.121  | 1.307  | -1.043 |
| O            | 6.108  | -2.654 | 5.098  | C | 6.040  | 9.689  | 3.786  |
| O            | 4.542  | -1.508 | 3.941  | H | 5.611  | 9.844  | 2.793  |
| O            | 6.532  | 3.916  | 2.779  | H | 6.482  | 10.626 | 4.132  |
| H            | 6.082  | 4.646  | 3.286  | N | 8.150  | 8.693  | 4.687  |
| H            | 7.155  | 4.282  | 2.110  | C | 7.101  | 8.623  | 3.784  |
| O            | 7.930  | 1.436  | 2.649  | C | 8.856  | 7.592  | 4.522  |
| H            | 8.760  | 1.224  | 2.184  | H | 9.751  | 7.328  | 5.060  |
| H            | 7.329  | 0.677  | 2.478  | N | 8.335  | 6.814  | 3.535  |
|              |        |        |        | H | 8.659  | 5.876  | 3.313  |
| <b>K-III</b> |        |        |        | C | 7.212  | 7.462  | 3.052  |
| C            | 9.493  | 5.420  | 0.333  | H | 6.615  | 7.055  | 2.252  |
| H            | 9.343  | 6.459  | 0.656  | C | 2.406  | 4.006  | 6.886  |
| H            | 9.560  | 5.424  | -0.761 | H | 3.278  | 4.619  | 7.137  |
| O            | 8.393  | 4.599  | 0.744  | H | 2.050  | 3.516  | 7.794  |
| H            | 7.671  | 4.814  | 0.099  | C | 2.810  | 2.915  | 5.913  |
| C            | 12.597 | 0.664  | 2.372  | O | 2.371  | 1.754  | 6.025  |
| H            | 13.406 | 1.346  | 2.657  | N | 3.671  | 3.237  | 4.920  |
| H            | 11.841 | 0.748  | 3.157  | H | 4.188  | 2.453  | 4.539  |
| C            | 13.105 | -0.767 | 2.255  | H | 4.172  | 4.136  | 4.888  |

|    |        |        |        |             |        |        |        |
|----|--------|--------|--------|-------------|--------|--------|--------|
| C  | 6.882  | 5.486  | 7.988  | H           | 6.121  | 4.585  | 3.290  |
| H  | 7.828  | 4.958  | 7.864  | H           | 7.197  | 4.211  | 2.125  |
| H  | 6.144  | 4.743  | 8.299  | O           | 7.863  | 1.288  | 2.675  |
| C  | 6.407  | 6.126  | 6.683  | H           | 8.684  | 1.079  | 2.190  |
| H  | 5.463  | 6.670  | 6.800  | H           | 7.299  | 0.487  | 2.605  |
| H  | 7.130  | 6.859  | 6.305  | O           | 3.057  | 0.210  | 3.801  |
| C  | 6.188  | 5.104  | 5.571  | H           | 2.755  | 0.684  | 4.610  |
| O  | 6.776  | 3.984  | 5.623  | H           | 4.020  | 0.349  | 3.799  |
| O  | 5.388  | 5.432  | 4.625  |             |        |        |        |
| C  | 10.082 | 0.596  | 10.422 | <b>K-IV</b> |        |        |        |
| O  | 11.196 | 0.784  | 10.932 | C           | 9.509  | 5.470  | 0.320  |
| N  | 9.912  | 0.158  | 9.165  | H           | 9.363  | 6.508  | 0.643  |
| H  | 8.987  | 0.072  | 8.747  | H           | 9.571  | 5.469  | -0.775 |
| C  | 11.055 | -0.065 | 8.292  | O           | 8.418  | 4.646  | 0.745  |
| H  | 10.691 | -0.592 | 7.406  | H           | 7.672  | 4.899  | 0.139  |
| H  | 11.810 | -0.674 | 8.794  | C           | 12.438 | 0.641  | 2.345  |
| C  | 11.752 | 1.244  | 7.893  | H           | 13.263 | 1.278  | 2.685  |
| O  | 12.945 | 1.443  | 8.104  | H           | 11.645 | 0.734  | 3.092  |
| N  | 10.919 | 2.197  | 7.364  | C           | 12.887 | -0.810 | 2.236  |
| H  | 9.993  | 1.918  | 7.049  | C           | 14.129 | -1.154 | 1.685  |
| C  | 11.399 | 3.506  | 6.920  | H           | 14.804 | -0.370 | 1.358  |
| H  | 12.350 | 3.383  | 6.392  | C           | 14.497 | -2.491 | 1.538  |
| C  | 10.381 | 4.190  | 6.003  | H           | 15.455 | -2.734 | 1.088  |
| H  | 9.371  | 4.162  | 6.420  | C           | 13.637 | -3.511 | 1.950  |
| H  | 10.638 | 5.249  | 5.869  | H           | 13.915 | -4.552 | 1.808  |
| C  | 10.348 | 3.609  | 4.579  | C           | 12.043 | -1.843 | 2.670  |
| O  | 11.365 | 3.089  | 4.098  | H           | 11.077 | -1.588 | 3.102  |
| O  | 9.239  | 3.754  | 3.931  | C           | 12.413 | -3.181 | 2.532  |
| Mg | 7.611  | 2.703  | 4.213  | H           | 11.741 | -3.968 | 2.868  |
| C  | 7.571  | 0.581  | 6.266  | C           | 0.255  | 2.862  | 0.587  |
| O  | 5.825  | 1.018  | 4.677  | H           | 0.787  | 3.427  | -0.186 |
| O  | 7.847  | -0.100 | 7.264  | H           | -0.395 | 3.579  | 1.102  |
| C  | 6.165  | 0.330  | 5.647  | C           | 1.260  | 2.315  | 1.603  |
| O  | 8.257  | 1.485  | 5.703  | H           | 1.694  | 3.156  | 2.149  |
| C  | 5.247  | -0.648 | 6.327  | H           | 0.790  | 1.682  | 2.365  |
| H  | 4.844  | -0.141 | 7.212  | N           | 2.356  | 1.601  | 0.929  |
| H  | 4.409  | -0.880 | 5.668  | H           | 2.144  | 1.205  | 0.003  |
| C  | 5.901  | -1.977 | 6.787  | C           | 3.631  | 2.018  | 1.001  |
| O  | 5.835  | -2.287 | 7.994  | N           | 4.112  | 2.674  | 2.043  |
| O  | 6.405  | -2.694 | 5.867  | H           | 5.083  | 3.014  | 2.046  |
| O  | 2.989  | -2.471 | 4.536  | H           | 3.618  | 2.745  | 2.930  |
| H  | 3.810  | -2.813 | 4.125  | N           | 4.457  | 1.715  | -0.044 |
| H  | 2.936  | -1.549 | 4.199  | H           | 5.124  | 2.508  | -0.238 |
| O  | 6.558  | 3.846  | 2.781  | H           | 3.901  | 1.452  | -0.875 |

|   |        |        |        |                          |        |        |        |
|---|--------|--------|--------|--------------------------|--------|--------|--------|
| C | 6.042  | 9.826  | 3.771  | C                        | 10.130 | 3.814  | 4.757  |
| H | 5.637  | 10.008 | 2.773  | O                        | 10.948 | 3.115  | 4.105  |
| H | 6.466  | 10.755 | 4.158  | O                        | 8.939  | 4.064  | 4.369  |
| N | 8.151  | 8.816  | 4.672  | Mg                       | 7.476  | 2.689  | 4.364  |
| C | 7.104  | 8.764  | 3.765  | C                        | 7.598  | 0.486  | 6.275  |
| C | 8.834  | 7.699  | 4.511  | O                        | 6.193  | 0.824  | 4.374  |
| H | 9.717  | 7.413  | 5.057  | O                        | 7.852  | -0.290 | 7.222  |
| N | 8.304  | 6.936  | 3.516  | C                        | 6.479  | 0.045  | 5.289  |
| H | 8.564  | 5.972  | 3.334  | O                        | 8.124  | 1.605  | 6.021  |
| C | 7.196  | 7.604  | 3.033  | C                        | 5.805  | -1.264 | 5.533  |
| H | 6.578  | 7.195  | 2.251  | H                        | 5.656  | -1.816 | 4.598  |
| C | 2.221  | 4.098  | 6.549  | H                        | 6.412  | -1.878 | 6.195  |
| H | 3.182  | 4.604  | 6.673  | C                        | 4.394  | -1.124 | 6.173  |
| H | 1.942  | 3.667  | 7.519  | O                        | 3.893  | -2.167 | 6.669  |
| C | 2.302  | 2.920  | 5.587  | O                        | 3.829  | -0.001 | 6.104  |
| O | 1.306  | 2.253  | 5.290  | O                        | 6.585  | 3.704  | 2.766  |
| N | 3.542  | 2.613  | 5.092  | H                        | 6.116  | 4.477  | 3.229  |
| H | 3.704  | 1.611  | 4.978  | H                        | 7.234  | 4.066  | 2.123  |
| H | 4.363  | 3.098  | 5.451  | O                        | 8.817  | 1.559  | 3.175  |
| C | 6.781  | 5.489  | 7.795  | H                        | 9.677  | 2.017  | 3.321  |
| H | 7.724  | 4.967  | 7.632  | H                        | 8.904  | 1.070  | 2.333  |
| H | 6.068  | 4.734  | 8.133  | O                        | 6.146  | -1.118 | 2.182  |
| C | 6.239  | 6.105  | 6.506  | H                        | 5.928  | -1.069 | 1.223  |
| H | 5.290  | 6.634  | 6.666  | H                        | 5.876  | -0.276 | 2.576  |
| H | 6.924  | 6.850  | 6.086  | O                        | 4.849  | -3.321 | 3.114  |
| C | 5.980  | 5.077  | 5.399  | H                        | 3.964  | -3.124 | 3.478  |
| O | 6.276  | 3.843  | 5.603  | H                        | 5.195  | -2.494 | 2.715  |
| O | 5.477  | 5.494  | 4.320  |                          |        |        |        |
| C | 10.012 | 0.677  | 10.360 | <b>TS<sub>I-II</sub></b> |        |        |        |
| O | 11.113 | 0.852  | 10.903 | C                        | 9.737  | 5.417  | 0.167  |
| N | 9.871  | 0.284  | 9.085  | H                        | 9.660  | 6.503  | 0.321  |
| H | 8.951  | 0.173  | 8.659  | H                        | 9.743  | 5.241  | -0.918 |
| C | 11.026 | 0.042  | 8.238  | O                        | 8.658  | 4.743  | 0.804  |
| H | 10.678 | -0.492 | 7.349  | H                        | 7.847  | 5.035  | 0.318  |
| H | 11.766 | -0.570 | 8.758  | C                        | 12.647 | 0.603  | 2.277  |
| C | 11.747 | 1.330  | 7.833  | H                        | 13.526 | 1.194  | 2.555  |
| O | 12.957 | 1.468  | 7.977  | H                        | 11.895 | 0.797  | 3.045  |
| N | 10.934 | 2.331  | 7.366  | C                        | 12.987 | -0.879 | 2.216  |
| H | 9.958  | 2.130  | 7.158  | C                        | 14.206 | -1.341 | 1.701  |
| C | 11.481 | 3.622  | 6.955  | H                        | 14.947 | -0.625 | 1.360  |
| H | 12.429 | 3.451  | 6.438  | C                        | 14.465 | -2.709 | 1.602  |
| C | 10.523 | 4.444  | 6.092  | H                        | 15.407 | -3.045 | 1.178  |
| H | 9.596  | 4.687  | 6.619  | C                        | 13.518 | -3.643 | 2.026  |
| H | 10.998 | 5.401  | 5.837  | H                        | 13.713 | -4.707 | 1.924  |

|   |        |        |        |                            |        |        |        |
|---|--------|--------|--------|----------------------------|--------|--------|--------|
| C | 12.053 | -1.829 | 2.660  | C                          | 6.254  | 5.081  | 5.469  |
| H | 11.095 | -1.481 | 3.042  | O                          | 6.959  | 4.030  | 5.438  |
| C | 12.311 | -3.197 | 2.568  | O                          | 5.325  | 5.335  | 4.627  |
| H | 11.563 | -3.913 | 2.901  | C                          | 10.089 | 0.528  | 10.226 |
| C | 0.221  | 2.707  | 0.460  | O                          | 11.185 | 0.701  | 10.777 |
| H | 0.766  | 3.280  | -0.297 | N                          | 9.957  | 0.153  | 8.944  |
| H | -0.387 | 3.427  | 1.019  | H                          | 9.043  | 0.080  | 8.500  |
| C | 1.198  | 2.050  | 1.428  | C                          | 11.130 | -0.050 | 8.104  |
| H | 1.658  | 2.818  | 2.056  | H                          | 10.800 | -0.567 | 7.198  |
| H | 0.692  | 1.366  | 2.118  | H                          | 11.871 | -0.660 | 8.624  |
| N | 2.292  | 1.370  | 0.713  | C                          | 11.819 | 1.274  | 7.752  |
| H | 2.151  | 1.131  | -0.284 | O                          | 12.997 | 1.494  | 8.018  |
| C | 3.569  | 1.637  | 1.010  | N                          | 10.983 | 2.208  | 7.205  |
| N | 3.902  | 1.999  | 2.240  | H                          | 10.073 | 1.910  | 6.861  |
| H | 4.840  | 2.352  | 2.455  | C                          | 11.437 | 3.534  | 6.782  |
| H | 3.318  | 1.640  | 3.004  | H                          | 12.404 | 3.437  | 6.279  |
| N | 4.514  | 1.503  | 0.032  | C                          | 10.426 | 4.170  | 5.827  |
| H | 5.215  | 2.280  | 0.055  | H                          | 9.405  | 4.134  | 6.218  |
| H | 4.077  | 1.417  | -0.891 | H                          | 10.670 | 5.228  | 5.670  |
| C | 5.961  | 9.615  | 3.741  | C                          | 10.454 | 3.533  | 4.422  |
| H | 5.456  | 9.845  | 2.800  | O                          | 11.530 | 3.091  | 3.982  |
| H | 6.474  | 10.514 | 4.094  | O                          | 9.360  | 3.548  | 3.756  |
| N | 8.083  | 8.423  | 4.369  | Mg                         | 7.638  | 2.702  | 4.012  |
| C | 6.959  | 8.504  | 3.567  | C                          | 7.597  | 0.505  | 6.044  |
| C | 8.718  | 7.322  | 4.001  | O                          | 5.877  | 1.194  | 4.538  |
| H | 9.639  | 6.957  | 4.427  | O                          | 7.833  | -0.234 | 7.026  |
| N | 8.069  | 6.692  | 2.986  | C                          | 6.180  | 0.383  | 5.415  |
| H | 8.360  | 5.840  | 2.502  | O                          | 8.320  | 1.405  | 5.541  |
| C | 6.946  | 7.437  | 2.697  | C                          | 5.221  | -0.626 | 5.973  |
| H | 6.257  | 7.148  | 1.923  | H                          | 5.489  | -0.816 | 7.015  |
| C | 2.414  | 4.052  | 7.222  | H                          | 4.205  | -0.221 | 5.939  |
| H | 3.282  | 4.691  | 7.410  | C                          | 5.203  | -2.032 | 5.291  |
| H | 2.073  | 3.640  | 8.174  | O                          | 5.986  | -2.285 | 4.345  |
| C | 2.804  | 2.886  | 6.340  | O                          | 4.350  | -2.815 | 5.786  |
| O | 2.288  | 1.759  | 6.490  | O                          | 6.195  | 3.620  | 2.733  |
| N | 3.733  | 3.114  | 5.401  | H                          | 5.782  | 4.368  | 3.252  |
| H | 4.116  | 2.312  | 4.914  | H                          | 6.213  | 3.831  | 1.768  |
| H | 4.175  | 4.020  | 5.219  | O                          | 7.923  | 1.363  | 2.445  |
| C | 6.958  | 5.429  | 7.883  | H                          | 8.768  | 1.143  | 2.005  |
| H | 7.909  | 4.914  | 7.747  | H                          | 7.339  | 0.580  | 2.315  |
| H | 6.228  | 4.669  | 8.174  |                            |        |        |        |
| C | 6.487  | 6.097  | 6.588  | <b>TS<sub>II-III</sub></b> |        |        |        |
| H | 5.549  | 6.648  | 6.720  | C                          | 9.493  | 5.420  | 0.343  |
| H | 7.222  | 6.823  | 6.218  | H                          | 9.344  | 6.461  | 0.659  |

|   |        |        |        |    |        |        |        |
|---|--------|--------|--------|----|--------|--------|--------|
| H | 9.553  | 5.415  | -0.752 | H  | 3.279  | 4.584  | 7.162  |
| O | 8.397  | 4.602  | 0.769  | H  | 2.065  | 3.486  | 7.849  |
| H | 7.670  | 4.815  | 0.130  | C  | 2.814  | 2.854  | 5.972  |
| C | 12.634 | 0.682  | 2.368  | O  | 2.410  | 1.687  | 6.118  |
| H | 13.443 | 1.365  | 2.653  | N  | 3.646  | 3.169  | 4.949  |
| H | 11.876 | 0.765  | 3.151  | H  | 4.145  | 2.370  | 4.569  |
| C | 13.142 | -0.748 | 2.248  | H  | 4.156  | 4.062  | 4.904  |
| C | 14.282 | -1.061 | 1.495  | C  | 6.900  | 5.450  | 8.015  |
| H | 14.849 | -0.263 | 1.031  | H  | 7.851  | 4.933  | 7.885  |
| C | 14.677 | -2.384 | 1.313  | H  | 6.173  | 4.698  | 8.330  |
| H | 15.550 | -2.600 | 0.706  | C  | 6.409  | 6.088  | 6.716  |
| C | 13.942 | -3.426 | 1.881  | H  | 5.466  | 6.631  | 6.842  |
| H | 14.230 | -4.459 | 1.701  | H  | 7.126  | 6.821  | 6.328  |
| C | 12.443 | -1.800 | 2.858  | C  | 6.178  | 5.065  | 5.608  |
| H | 11.579 | -1.577 | 3.478  | O  | 6.768  | 3.944  | 5.661  |
| C | 12.833 | -3.128 | 2.673  | O  | 5.375  | 5.395  | 4.668  |
| H | 12.260 | -3.928 | 3.137  | C  | 10.106 | 0.550  | 10.341 |
| C | 0.271  | 2.803  | 0.489  | O  | 11.206 | 0.741  | 10.876 |
| H | 0.748  | 3.415  | -0.284 | N  | 9.968  | 0.141  | 9.069  |
| H | -0.366 | 3.479  | 1.070  | H  | 9.052  | 0.052  | 8.634  |
| C | 1.344  | 2.234  | 1.416  | C  | 11.133 | -0.065 | 8.220  |
| H | 1.751  | 3.062  | 2.003  | H  | 10.796 | -0.590 | 7.322  |
| H | 0.940  | 1.518  | 2.140  | H  | 11.882 | -0.668 | 8.736  |
| N | 2.439  | 1.630  | 0.658  | C  | 11.819 | 1.256  | 7.845  |
| H | 2.236  | 1.244  | -0.281 | O  | 13.006 | 1.466  | 8.069  |
| C | 3.724  | 1.950  | 0.811  | N  | 10.976 | 2.202  | 7.324  |
| N | 4.174  | 2.599  | 1.877  | H  | 10.055 | 1.914  | 7.003  |
| H | 5.132  | 2.963  | 1.931  | C  | 11.435 | 3.526  | 6.903  |
| H | 3.552  | 2.833  | 2.635  | H  | 12.383 | 3.426  | 6.366  |
| N | 4.609  | 1.567  | -0.156 | C  | 10.402 | 4.213  | 6.009  |
| H | 5.286  | 2.352  | -0.339 | H  | 9.398  | 4.189  | 6.443  |
| H | 4.114  | 1.280  | -1.011 | H  | 10.660 | 5.271  | 5.874  |
| C | 6.034  | 9.661  | 3.800  | C  | 10.342 | 3.634  | 4.586  |
| H | 5.598  | 9.813  | 2.810  | O  | 11.350 | 3.114  | 4.086  |
| H | 6.480  | 10.599 | 4.139  | O  | 9.219  | 3.779  | 3.966  |
| N | 8.143  | 8.659  | 4.696  | Mg | 7.604  | 2.694  | 4.236  |
| C | 7.093  | 8.593  | 3.795  | C  | 7.579  | 0.485  | 6.223  |
| C | 8.846  | 7.557  | 4.526  | O  | 5.770  | 0.984  | 4.707  |
| H | 9.742  | 7.290  | 5.063  | O  | 7.917  | -0.293 | 7.138  |
| N | 8.323  | 6.782  | 3.538  | C  | 6.129  | 0.326  | 5.690  |
| H | 8.644  | 5.844  | 3.313  | O  | 8.249  | 1.427  | 5.710  |
| C | 7.200  | 7.434  | 3.060  | C  | 5.229  | -0.638 | 6.415  |
| H | 6.602  | 7.031  | 2.259  | H  | 5.556  | -0.800 | 7.439  |
| C | 2.410  | 3.962  | 6.928  | H  | 4.198  | -0.269 | 6.403  |



|                            |        |        |        |   |        |        |        |
|----------------------------|--------|--------|--------|---|--------|--------|--------|
| C                          | 5.255  | -2.008 | 5.672  | H | 3.971  | 1.529  | -0.941 |
| O                          | 4.824  | -2.980 | 6.330  | C | 6.049  | 9.853  | 3.769  |
| O                          | 5.731  | -2.029 | 4.511  | H | 5.649  | 10.046 | 2.772  |
| O                          | 6.535  | 3.829  | 2.815  | H | 6.471  | 10.778 | 4.169  |
| H                          | 6.093  | 4.566  | 3.322  | N | 8.157  | 8.829  | 4.662  |
| H                          | 7.166  | 4.192  | 2.153  | C | 7.111  | 8.791  | 3.754  |
| O                          | 7.951  | 1.385  | 2.662  | C | 8.837  | 7.713  | 4.489  |
| H                          | 8.795  | 1.179  | 2.220  | H | 9.720  | 7.417  | 5.033  |
| H                          | 7.381  | 0.593  | 2.519  | N | 8.307  | 6.964  | 3.484  |
|                            |        |        |        | H | 8.561  | 6.003  | 3.287  |
| <b>TS<sub>III-IV</sub></b> |        |        |        | C | 7.200  | 7.639  | 3.008  |
| C                          | 9.555  | 5.527  | 0.276  | H | 6.581  | 7.240  | 2.224  |
| H                          | 9.410  | 6.563  | 0.611  | C | 2.246  | 4.058  | 6.567  |
| H                          | 9.620  | 5.539  | -0.819 | H | 3.209  | 4.561  | 6.682  |
| O                          | 8.461  | 4.702  | 0.689  | H | 1.965  | 3.653  | 7.548  |
| H                          | 7.717  | 4.958  | 0.083  | C | 2.328  | 2.856  | 5.638  |
| C                          | 12.469 | 0.683  | 2.294  | O | 1.330  | 2.200  | 5.311  |
| H                          | 13.314 | 1.300  | 2.621  | N | 3.572  | 2.508  | 5.202  |
| H                          | 11.685 | 0.805  | 3.046  | H | 3.671  | 1.533  | 4.954  |
| C                          | 12.875 | -0.782 | 2.205  | H | 4.419  | 2.963  | 5.548  |
| C                          | 14.101 | -1.174 | 1.652  | C | 6.748  | 5.473  | 7.711  |
| H                          | 14.795 | -0.418 | 1.300  | H | 7.692  | 4.953  | 7.543  |
| C                          | 14.432 | -2.525 | 1.536  | H | 6.039  | 4.717  | 8.055  |
| H                          | 15.379 | -2.806 | 1.086  | C | 6.199  | 6.082  | 6.421  |
| C                          | 13.547 | -3.510 | 1.980  | H | 5.240  | 6.594  | 6.584  |
| H                          | 13.795 | -4.561 | 1.864  | H | 6.871  | 6.840  | 6.006  |
| C                          | 12.005 | -1.781 | 2.670  | C | 5.957  | 5.057  | 5.301  |
| H                          | 11.052 | -1.487 | 3.105  | O | 6.235  | 3.819  | 5.499  |
| C                          | 12.337 | -3.132 | 2.562  | O | 5.490  | 5.490  | 4.212  |
| H                          | 11.647 | -3.892 | 2.923  | C | 9.919  | 0.598  | 10.096 |
| C                          | 0.273  | 2.882  | 0.578  | O | 11.079 | 0.747  | 10.509 |
| H                          | 0.777  | 3.468  | -0.198 | N | 9.628  | 0.246  | 8.832  |
| H                          | -0.373 | 3.579  | 1.122  | H | 8.665  | 0.132  | 8.517  |
| C                          | 1.314  | 2.330  | 1.555  | C | 10.691 | -0.008 | 7.874  |
| H                          | 1.736  | 3.170  | 2.114  | H | 10.227 | -0.401 | 6.965  |
| H                          | 0.875  | 1.664  | 2.306  | H | 11.401 | -0.742 | 8.261  |
| N                          | 2.412  | 1.667  | 0.841  | C | 11.516 | 1.240  | 7.544  |
| H                          | 2.201  | 1.288  | -0.095 | O | 12.740 | 1.226  | 7.550  |
| C                          | 3.688  | 2.064  | 0.935  | N | 10.782 | 2.371  | 7.279  |
| N                          | 4.163  | 2.700  | 1.996  | H | 9.776  | 2.285  | 7.158  |
| H                          | 5.140  | 3.022  | 2.020  | C | 11.450 | 3.619  | 6.933  |
| H                          | 3.642  | 2.779  | 2.860  | H | 12.391 | 3.369  | 6.437  |
| N                          | 4.523  | 1.784  | -0.108 | C | 10.607 | 4.556  | 6.065  |
| H                          | 5.175  | 2.592  | -0.291 | H | 9.704  | 4.900  | 6.577  |

|                          |        |        |        |   |        |        |        |
|--------------------------|--------|--------|--------|---|--------|--------|--------|
| H                        | 11.198 | 5.448  | 5.817  | C | 0.187  | 2.766  | 0.471  |
| C                        | 10.176 | 3.939  | 4.740  | H | 0.741  | 3.333  | -0.285 |
| O                        | 11.002 | 3.297  | 4.036  | H | -0.435 | 3.490  | 1.007  |
| O                        | 8.955  | 4.117  | 4.423  | C | 1.151  | 2.136  | 1.469  |
| Mg                       | 7.573  | 2.684  | 4.285  | H | 1.598  | 2.922  | 2.084  |
| C                        | 7.164  | 0.534  | 6.183  | H | 0.640  | 1.463  | 2.166  |
| O                        | 6.533  | 0.626  | 3.920  | N | 2.259  | 1.448  | 0.782  |
| O                        | 7.310  | -0.340 | 7.056  | H | 2.127  | 1.181  | -0.207 |
| C                        | 6.157  | 0.223  | 5.028  | C | 3.530  | 1.745  | 1.075  |
| O                        | 7.841  | 1.590  | 6.010  | N | 3.866  | 2.131  | 2.297  |
| C                        | 5.096  | -0.838 | 5.136  | H | 4.794  | 2.528  | 2.502  |
| H                        | 4.274  | -0.601 | 4.454  | H | 3.279  | 1.799  | 3.069  |
| H                        | 5.569  | -1.738 | 4.711  | N | 4.467  | 1.618  | 0.085  |
| C                        | 4.525  | -1.110 | 6.532  | H | 5.164  | 2.403  | 0.088  |
| O                        | 4.135  | -2.279 | 6.822  | H | 4.007  | 1.527  | -0.828 |
| O                        | 4.330  | -0.065 | 7.194  | C | 5.987  | 9.694  | 3.725  |
| O                        | 6.659  | 3.699  | 2.702  | H | 5.509  | 9.940  | 2.774  |
| H                        | 6.174  | 4.470  | 3.152  | H | 6.488  | 10.586 | 4.108  |
| H                        | 7.287  | 4.064  | 2.041  | N | 8.090  | 8.487  | 4.392  |
| O                        | 9.011  | 1.693  | 3.148  | C | 6.987  | 8.584  | 3.561  |
| H                        | 9.849  | 2.203  | 3.260  | C | 8.725  | 7.383  | 4.033  |
| H                        | 9.086  | 1.175  | 2.323  | H | 9.635  | 7.010  | 4.476  |
|                          |        |        |        | N | 8.098  | 6.768  | 2.995  |
| <b>TS<sub>I-IV</sub></b> |        |        |        | H | 8.378  | 5.906  | 2.526  |
| C                        | 9.738  | 5.443  | 0.177  | C | 6.990  | 7.525  | 2.682  |
| H                        | 9.661  | 6.529  | 0.330  | H | 6.309  | 7.239  | 1.901  |
| H                        | 9.750  | 5.265  | -0.907 | C | 2.471  | 4.118  | 7.221  |
| O                        | 8.656  | 4.769  | 0.810  | H | 3.402  | 4.679  | 7.342  |
| H                        | 7.848  | 5.069  | 0.323  | H | 2.124  | 3.833  | 8.221  |
| C                        | 12.570 | 0.619  | 2.329  | C | 2.666  | 2.823  | 6.463  |
| H                        | 13.449 | 1.201  | 2.626  | O | 1.708  | 2.054  | 6.251  |
| H                        | 11.804 | 0.820  | 3.082  | N | 3.912  | 2.508  | 6.067  |
| C                        | 12.898 | -0.867 | 2.273  | H | 4.025  | 1.607  | 5.620  |
| C                        | 14.088 | -1.344 | 1.706  | H | 4.725  | 3.120  | 6.098  |
| H                        | 14.817 | -0.637 | 1.324  | C | 6.842  | 5.455  | 7.817  |
| C                        | 14.333 | -2.715 | 1.608  | H | 7.784  | 4.935  | 7.645  |
| H                        | 15.252 | -3.062 | 1.145  | H | 6.125  | 4.695  | 8.140  |
| C                        | 13.398 | -3.637 | 2.080  | C | 6.318  | 6.115  | 6.540  |
| H                        | 13.577 | -4.704 | 1.975  | H | 5.382  | 6.664  | 6.707  |
| C                        | 11.980 | -1.806 | 2.771  | H | 7.027  | 6.851  | 6.141  |
| H                        | 11.055 | -1.443 | 3.217  | C | 6.050  | 5.113  | 5.412  |
| C                        | 12.224 | -3.177 | 2.678  | O | 6.510  | 3.918  | 5.532  |
| H                        | 11.497 | -3.891 | 3.060  |   |        |        |        |
| O                        | 5.379  | 5.497  | 4.418  | C | 10.061 | 0.627  | 10.404 |

|            |        |        |        |   |        |        |        |
|------------|--------|--------|--------|---|--------|--------|--------|
| O          | 11.174 | 0.762  | 10.931 | H | 11.819 | 0.849  | 3.072  |
| N          | 9.891  | 0.259  | 9.124  | C | 12.931 | -0.826 | 2.259  |
| H          | 8.962  | 0.204  | 8.707  | C | 14.143 | -1.286 | 1.724  |
| C          | 11.036 | 0.013  | 8.259  | H | 14.876 | -0.567 | 1.372  |
| H          | 10.673 | -0.520 | 7.375  | C | 14.403 | -2.652 | 1.615  |
| H          | 11.778 | -0.600 | 8.773  | H | 15.338 | -2.985 | 1.173  |
| C          | 11.750 | 1.306  | 7.845  | C | 13.464 | -3.589 | 2.050  |
| O          | 12.947 | 1.484  | 8.050  | H | 13.657 | -4.653 | 1.937  |
| N          | 10.927 | 2.257  | 7.310  | C | 12.008 | -1.780 | 2.715  |
| H          | 9.972  | 2.009  | 7.057  | H | 11.060 | -1.424 | 3.117  |
| C          | 11.406 | 3.564  | 6.858  | C | 12.268 | -3.148 | 2.616  |
| H          | 12.358 | 3.436  | 6.335  | H | 11.533 | -3.872 | 2.962  |
| C          | 10.388 | 4.230  | 5.931  | C | 0.099  | 2.890  | 0.279  |
| H          | 9.385  | 4.235  | 6.366  | H | 0.662  | 3.429  | -0.490 |
| H          | 10.667 | 5.276  | 5.756  | H | -0.529 | 3.630  | 0.784  |
| C          | 10.323 | 3.590  | 4.530  | C | 1.033  | 2.288  | 1.312  |
| O          | 11.362 | 3.139  | 4.017  | H | 1.442  | 3.090  | 1.932  |
| O          | 9.183  | 3.622  | 3.945  | H | 0.507  | 1.619  | 1.999  |
| Mg         | 7.502  | 2.712  | 4.158  | N | 2.171  | 1.602  | 0.685  |
| C          | 7.535  | 0.620  | 6.340  | H | 2.090  | 1.300  | -0.302 |
| O          | 6.115  | 0.992  | 4.455  | C | 3.425  | 1.845  | 1.067  |
| O          | 7.740  | -0.133 | 7.319  | N | 3.691  | 2.294  | 2.286  |
| C          | 6.379  | 0.223  | 5.378  | H | 4.626  | 2.654  | 2.530  |
| O          | 8.180  | 1.628  | 5.956  | H | 2.976  | 2.186  | 3.007  |
| C          | 6.013  | -1.227 | 5.321  | N | 4.433  | 1.601  | 0.168  |
| H          | 6.637  | -1.679 | 4.546  | H | 5.147  | 2.367  | 0.168  |
| H          | 6.304  | -1.678 | 6.274  | H | 4.043  | 1.479  | -0.772 |
| C          | 4.525  | -1.546 | 5.127  | C | 5.989  | 9.692  | 3.728  |
| O          | 4.218  | -2.365 | 4.208  | H | 5.504  | 9.933  | 2.778  |
| O          | 3.713  | -0.957 | 5.891  | H | 6.487  | 10.589 | 4.105  |
| O          | 6.188  | 3.631  | 2.748  | N | 8.103  | 8.500  | 4.387  |
| H          | 5.789  | 4.423  | 3.238  | C | 6.995  | 8.588  | 3.562  |
| H          | 6.291  | 3.843  | 1.792  | C | 8.740  | 7.397  | 4.029  |
| O          | 7.985  | 1.227  | 2.680  | H | 9.652  | 7.029  | 4.471  |
| H          | 8.787  | 1.125  | 2.131  | N | 8.111  | 6.776  | 2.997  |
| H          | 7.416  | 0.460  | 2.475  | H | 8.388  | 5.909  | 2.533  |
|            |        |        |        | C | 6.998  | 7.526  | 2.687  |
| <b>E-A</b> |        |        |        | H | 6.314  | 7.231  | 1.912  |
| C          | 9.727  | 5.460  | 0.178  | C | 2.555  | 4.141  | 7.378  |
| O          | 8.654  | 4.786  | 0.825  | H | 3.463  | 4.745  | 7.460  |
| H          | 9.648  | 6.546  | 0.325  |   |        |        |        |
| C          | 12.587 | 0.655  | 2.318  |   |        |        |        |
| H          | 9.730  | 5.276  | -0.905 |   |        |        |        |
| H          | 13.460 | 1.247  | 2.612  |   |        |        |        |

|            |        |        |        |    |        |        |        |
|------------|--------|--------|--------|----|--------|--------|--------|
| H          | 2.217  | 3.888  | 8.388  | H  | 11.797 | -0.671 | 8.623  |
| C          | 2.785  | 2.834  | 6.658  | C  | 11.748 | 1.262  | 7.751  |
| O          | 1.916  | 1.942  | 6.669  | O  | 12.941 | 1.454  | 7.965  |
| N          | 3.938  | 2.669  | 5.994  | N  | 10.910 | 2.215  | 7.242  |
| H          | 4.057  | 1.801  | 5.494  | H  | 9.968  | 1.946  | 6.967  |
| H          | 4.727  | 3.309  | 5.977  | C  | 11.366 | 3.539  | 6.818  |
| C          | 6.875  | 5.434  | 7.826  | H  | 12.314 | 3.436  | 6.281  |
| H          | 7.813  | 4.898  | 7.682  | C  | 10.329 | 4.201  | 5.910  |
| H          | 6.137  | 4.687  | 8.134  | H  | 9.327  | 4.172  | 6.347  |
| C          | 6.398  | 6.097  | 6.533  | H  | 10.581 | 5.257  | 5.755  |
| H          | 5.471  | 6.667  | 6.675  | C  | 10.277 | 3.580  | 4.499  |
| H          | 7.132  | 6.815  | 6.148  | O  | 11.327 | 3.152  | 3.987  |
| C          | 6.129  | 5.096  | 5.402  | O  | 9.140  | 3.603  | 3.913  |
| O          | 6.583  | 3.899  | 5.512  | Mg | 7.481  | 2.619  | 4.081  |
| O          | 5.443  | 5.487  | 4.419  | C  | 7.457  | 0.431  | 6.195  |
| C          | 10.069 | 0.535  | 10.273 | O  | 5.843  | 0.866  | 4.471  |
| O          | 11.182 | 0.677  | 10.800 | O  | 7.806  | -0.304 | 7.151  |
| N          | 9.901  | 0.164  | 8.994  | C  | 6.113  | 0.121  | 5.549  |
| H          | 8.976  | 0.100  | 8.568  | O  | 8.083  | 1.414  | 5.711  |
| C          | 11.049 | -0.051 | 8.126  | C  | 5.236  | -0.808 | 6.029  |
| H          | 10.688 | -0.559 | 7.227  | H  | 6.384  | -2.261 | 4.798  |
| H          | 5.478  | -1.341 | 6.941  | C  | 12.611 | 0.692  | 2.347  |
| C          | 3.914  | -0.981 | 5.390  | H  | 13.425 | 1.370  | 2.625  |
| O          | 3.731  | -0.364 | 4.280  | H  | 11.857 | 0.790  | 3.132  |
| O          | 3.026  | -1.709 | 5.930  | C  | 13.107 | -0.743 | 2.243  |
| O          | 6.123  | 3.590  | 2.753  | C  | 14.207 | -1.084 | 1.444  |
| H          | 5.792  | 4.410  | 3.254  | H  | 14.748 | -0.304 | 0.923  |
| H          | 6.220  | 3.797  | 1.793  | C  | 14.597 | -2.413 | 1.293  |
| O          | 7.925  | 1.225  | 2.623  | H  | 15.442 | -2.650 | 0.655  |
| H          | 8.740  | 1.122  | 2.098  | C  | 13.892 | -3.433 | 1.933  |
| H          | 7.386  | 0.412  | 2.458  | H  | 14.171 | -4.472 | 1.773  |
| O          | 6.416  | -0.943 | 2.196  | C  | 12.441 | -1.773 | 2.925  |
| H          | 5.997  | -1.137 | 1.331  | H  | 11.618 | -1.525 | 3.591  |
| H          | 4.967  | 0.439  | 4.093  | C  | 12.822 | -3.107 | 2.768  |
| O          | 6.822  | -2.855 | 4.161  | H  | 12.278 | -3.889 | 3.293  |
| H          | 6.507  | -1.779 | 2.684  | C  | 0.287  | 2.701  | 0.590  |
| H          | 6.491  | -3.750 | 4.377  | H  | 0.784  | 3.334  | -0.153 |
|            |        |        |        | H  | -0.352 | 3.364  | 1.183  |
| <b>E-B</b> |        |        |        | C  | 1.339  | 2.078  | 1.514  |
| C          | 9.495  | 5.437  | 0.306  | H  | 1.724  | 2.863  | 2.169  |
| H          | 9.349  | 6.478  | 0.624  | H  | 0.920  | 1.311  | 2.174  |
| H          | 9.562  | 5.435  | -0.788 | N  | 2.459  | 1.525  | 0.754  |
| O          | 8.394  | 4.622  | 0.724  | H  | 2.258  | 1.126  | -0.177 |
| H          | 7.669  | 4.843  | 0.084  | C  | 3.721  | 1.957  | 0.851  |

|   |        |        |        |                          |        |        |        |
|---|--------|--------|--------|--------------------------|--------|--------|--------|
| N | 4.165  | 2.668  | 1.876  | H                        | 9.998  | 1.901  | 6.956  |
| H | 5.115  | 3.062  | 1.899  | C                        | 11.401 | 3.495  | 6.878  |
| H | 3.591  | 2.820  | 2.692  | H                        | 12.352 | 3.375  | 6.349  |
| N | 4.586  | 1.613  | -0.147 | C                        | 10.387 | 4.198  | 5.971  |
| H | 5.249  | 2.408  | -0.342 | H                        | 9.376  | 4.169  | 6.387  |
| H | 4.072  | 1.316  | -0.988 | H                        | 10.650 | 5.258  | 5.852  |
| C | 6.049  | 9.698  | 3.777  | C                        | 10.350 | 3.642  | 4.537  |
| H | 5.614  | 9.847  | 2.786  | O                        | 11.363 | 3.112  | 4.055  |
| H | 6.489  | 10.639 | 4.116  | O                        | 9.248  | 3.817  | 3.887  |
| N | 8.158  | 8.706  | 4.681  | Mg                       | 7.620  | 2.748  | 4.193  |
| C | 7.114  | 8.635  | 3.775  | C                        | 7.729  | 0.456  | 6.053  |
| C | 8.864  | 7.604  | 4.519  | O                        | 5.873  | 1.199  | 4.653  |
| H | 9.756  | 7.339  | 5.063  | O                        | 8.189  | -0.389 | 6.842  |
| N | 8.349  | 6.826  | 3.529  | C                        | 6.296  | 0.276  | 5.612  |
| H | 8.669  | 5.883  | 3.319  | O                        | 8.317  | 1.503  | 5.617  |
| C | 7.228  | 7.475  | 3.042  | C                        | 5.464  | -0.646 | 6.108  |
| H | 6.632  | 7.066  | 2.244  | H                        | 4.422  | -0.601 | 5.817  |
| C | 2.343  | 3.972  | 6.924  | H                        | 4.441  | -2.716 | 5.140  |
| H | 3.204  | 4.557  | 7.261  | C                        | 5.838  | -1.913 | 6.833  |
| H | 1.925  | 3.445  | 7.784  | O                        | 5.907  | -1.998 | 8.066  |
| C | 2.816  | 2.926  | 5.932  | O                        | 5.944  | -2.921 | 6.027  |
| O | 2.421  | 1.745  | 5.996  | O                        | 3.555  | -2.699 | 4.686  |
| N | 3.703  | 3.310  | 4.982  | H                        | 3.755  | -3.119 | 3.837  |
| H | 4.356  | 2.584  | 4.707  | H                        | 3.387  | -0.725 | 4.022  |
| H | 4.133  | 4.243  | 4.981  | O                        | 6.536  | 3.888  | 2.774  |
| C | 6.908  | 5.503  | 7.982  | H                        | 6.112  | 4.629  | 3.293  |
| H | 7.861  | 4.994  | 7.837  | H                        | 7.171  | 4.249  | 2.113  |
| H | 6.189  | 4.734  | 8.278  | O                        | 7.907  | 1.372  | 2.611  |
| C | 6.415  | 6.169  | 6.698  | H                        | 8.737  | 1.160  | 2.144  |
| H | 5.457  | 6.686  | 6.829  | H                        | 7.358  | 0.560  | 2.544  |
| H | 7.118  | 6.930  | 6.338  | O                        | 3.402  | 0.232  | 3.835  |
| C | 6.221  | 5.169  | 5.562  | H                        | 2.939  | 0.662  | 4.589  |
| O | 6.837  | 4.066  | 5.594  | H                        | 5.101  | 0.803  | 4.172  |
| O | 5.412  | 5.498  | 4.622  |                          |        |        |        |
| C | 10.063 | 0.577  | 10.301 |                          |        |        |        |
| O | 11.179 | 0.789  | 10.799 | <b>K-IV<sub>1W</sub></b> |        |        |        |
| N | 9.897  | 0.105  | 9.057  | C                        | 9.510  | 5.474  | 0.318  |
| H | 8.980  | -0.029 | 8.636  | H                        | 9.363  | 6.513  | 0.641  |
| C | 11.048 | -0.099 | 8.187  | H                        | 9.574  | 5.474  | -0.777 |
| H | 10.680 | -0.601 | 7.289  | O                        | 8.418  | 4.651  | 0.741  |
| H | 11.801 | -0.715 | 8.682  | H                        | 7.675  | 4.898  | 0.131  |
| C | 11.744 | 1.221  | 7.820  | C                        | 12.439 | 0.645  | 2.351  |
| O | 12.937 | 1.415  | 8.039  | H                        | 13.265 | 1.281  | 2.688  |
| N | 10.914 | 2.182  | 7.304  |                          |        |        |        |

|   |        |        |        |   |        |        |        |
|---|--------|--------|--------|---|--------|--------|--------|
| H | 11.648 | 0.739  | 3.099  | H | 8.578  | 5.986  | 3.340  |
| C | 12.886 | -0.807 | 2.241  | C | 7.204  | 7.614  | 3.033  |
| C | 14.127 | -1.151 | 1.689  | H | 6.589  | 7.203  | 2.250  |
| H | 14.802 | -0.369 | 1.360  | C | 2.218  | 4.108  | 6.553  |
| C | 14.494 | -2.489 | 1.541  | H | 3.178  | 4.613  | 6.685  |
| H | 15.451 | -2.733 | 1.089  | H | 1.933  | 3.670  | 7.518  |
| C | 13.634 | -3.508 | 1.953  | C | 2.303  | 2.938  | 5.583  |
| H | 13.910 | -4.550 | 1.811  | O | 1.309  | 2.267  | 5.284  |
| C | 12.041 | -1.839 | 2.676  | N | 3.542  | 2.642  | 5.079  |
| H | 11.077 | -1.584 | 3.110  | H | 3.709  | 1.642  | 4.959  |
| C | 12.410 | -3.178 | 2.537  | H | 4.362  | 3.129  | 5.439  |
| H | 11.738 | -3.964 | 2.874  | C | 6.779  | 5.507  | 7.799  |
| C | 0.265  | 2.874  | 0.585  | H | 7.721  | 4.985  | 7.631  |
| H | 0.790  | 3.439  | -0.193 | H | 6.065  | 4.751  | 8.132  |
| H | -0.383 | 3.589  | 1.102  | C | 6.236  | 6.135  | 6.516  |
| C | 1.280  | 2.335  | 1.596  | H | 5.286  | 6.661  | 6.680  |
| H | 1.717  | 3.183  | 2.131  | H | 6.920  | 6.883  | 6.101  |
| H | 0.819  | 1.709  | 2.367  | C | 5.978  | 5.113  | 5.403  |
| N | 2.373  | 1.619  | 0.919  | O | 6.286  | 3.880  | 5.600  |
| H | 2.159  | 1.221  | -0.006 | O | 5.465  | 5.530  | 4.329  |
| C | 3.651  | 2.023  | 0.995  | C | 10.005 | 0.674  | 10.353 |
| N | 4.133  | 2.682  | 2.035  | O | 11.107 | 0.842  | 10.895 |
| H | 5.104  | 3.023  | 2.038  | N | 9.860  | 0.286  | 9.076  |
| H | 3.634  | 2.767  | 2.917  | H | 8.939  | 0.181  | 8.652  |
| N | 4.479  | 1.705  | -0.045 | C | 11.014 | 0.044  | 8.228  |
| H | 5.147  | 2.498  | -0.243 | H | 10.663 | -0.482 | 7.335  |
| H | 3.925  | 1.442  | -0.876 | H | 11.751 | -0.576 | 8.743  |
| C | 6.041  | 9.833  | 3.769  | C | 11.742 | 1.331  | 7.832  |
| H | 5.635  | 10.010 | 2.771  | O | 12.952 | 1.464  | 7.980  |
| H | 6.462  | 10.764 | 4.153  | N | 10.934 | 2.337  | 7.367  |
| N | 8.151  | 8.829  | 4.674  | H | 9.958  | 2.141  | 7.155  |
| C | 7.106  | 8.774  | 3.764  | C | 11.487 | 3.627  | 6.961  |
| C | 8.837  | 7.714  | 4.515  | H | 12.436 | 3.454  | 6.445  |
| H | 9.720  | 7.430  | 5.063  | C | 10.532 | 4.454  | 6.099  |
| N | 8.313  | 6.950  | 3.519  | H | 9.602  | 4.691  | 6.623  |

|                             |        |        |        |   |        |        |        |
|-----------------------------|--------|--------|--------|---|--------|--------|--------|
| H                           | 11.006 | 5.414  | 5.853  | C | 12.881 | -0.794 | 2.250  |
| C                           | 10.148 | 3.834  | 4.758  | C | 14.111 | -1.151 | 1.681  |
| O                           | 10.962 | 3.126  | 4.113  | H | 14.785 | -0.375 | 1.334  |
| O                           | 8.964  | 4.100  | 4.358  | C | 14.469 | -2.492 | 1.539  |
| Mg                          | 7.490  | 2.743  | 4.361  | H | 15.417 | -2.746 | 1.075  |
| C                           | 7.601  | 0.536  | 6.262  | C | 13.609 | -3.503 | 1.974  |
| O                           | 6.206  | 0.934  | 4.364  | H | 13.878 | -4.547 | 1.837  |
| O                           | 7.829  | -0.260 | 7.199  | C | 12.038 | -1.819 | 2.707  |
| C                           | 6.488  | 0.132  | 5.259  | H | 11.083 | -1.553 | 3.158  |
| O                           | 8.146  | 1.651  | 6.028  | C | 12.397 | -3.161 | 2.575  |
| C                           | 5.810  | -1.186 | 5.433  | H | 11.727 | -3.940 | 2.931  |
| H                           | 5.621  | -1.596 | 4.438  | C | 0.289  | 2.890  | 0.576  |
| H                           | 6.440  | -1.873 | 5.993  | H | 0.802  | 3.452  | -0.212 |
| C                           | 4.428  | -1.084 | 6.144  | H | -0.356 | 3.605  | 1.097  |
| O                           | 3.972  | -2.136 | 6.660  | C | 1.321  | 2.367  | 1.579  |
| O                           | 3.838  | 0.027  | 6.090  | H | 1.764  | 3.225  | 2.092  |
| O                           | 6.595  | 3.752  | 2.764  | H | 0.876  | 1.751  | 2.369  |
| H                           | 6.117  | 4.519  | 3.223  | N | 2.406  | 1.645  | 0.896  |
| H                           | 7.241  | 4.115  | 2.118  | H | 2.196  | 1.246  | -0.033 |
| O                           | 8.826  | 1.584  | 3.184  | C | 3.692  | 1.999  | 0.999  |
| H                           | 9.690  | 2.035  | 3.332  | N | 4.172  | 2.660  | 2.039  |
| H                           | 8.911  | 1.100  | 2.339  | H | 5.138  | 3.018  | 2.044  |
| O                           | 5.991  | -1.158 | 2.230  | H | 3.648  | 2.791  | 2.902  |
| H                           | 5.819  | -1.143 | 1.261  | N | 4.544  | 1.619  | -0.010 |
| H                           | 5.810  | -0.264 | 2.551  | H | 5.199  | 2.417  | -0.230 |
|                             |        |        |        | H | 4.005  | 1.333  | -0.843 |
| <b>TS<sub>1W-IV-A</sub></b> |        |        |        | C | 6.043  | 9.849  | 3.769  |
| C                           | 9.514  | 5.484  | 0.321  | H | 5.637  | 10.022 | 2.770  |
| H                           | 9.365  | 6.522  | 0.644  | H | 6.460  | 10.783 | 4.152  |
| H                           | 9.576  | 5.484  | -0.774 | N | 8.157  | 8.859  | 4.679  |
| O                           | 8.426  | 4.657  | 0.747  | C | 7.114  | 8.795  | 3.769  |
| H                           | 7.679  | 4.904  | 0.139  | C | 8.848  | 7.746  | 4.527  |
| C                           | 12.442 | 0.660  | 2.355  | H | 9.731  | 7.468  | 5.079  |
| H                           | 13.270 | 1.293  | 2.694  | N | 8.328  | 6.974  | 3.535  |
| H                           | 11.649 | 0.761  | 3.102  | H | 8.594  | 6.007  | 3.369  |

|   |        |        |        |                         |        |        |        |
|---|--------|--------|--------|-------------------------|--------|--------|--------|
| C | 7.217  | 7.631  | 3.044  | C                       | 10.151 | 3.841  | 4.749  |
| H | 6.603  | 7.213  | 2.264  | O                       | 10.963 | 3.129  | 4.104  |
| C | 2.192  | 4.099  | 6.559  | O                       | 8.976  | 4.130  | 4.337  |
| H | 3.157  | 4.590  | 6.708  | Mg                      | 7.476  | 2.790  | 4.391  |
| H | 1.889  | 3.656  | 7.516  | C                       | 7.802  | 0.509  | 6.154  |
| C | 2.274  | 2.938  | 5.576  | O                       | 6.138  | 1.107  | 4.534  |
| O | 1.277  | 2.277  | 5.265  | O                       | 8.207  | -0.347 | 6.969  |
| N | 3.515  | 2.638  | 5.080  | C                       | 6.518  | 0.192  | 5.359  |
| H | 3.678  | 1.634  | 4.954  | O                       | 8.283  | 1.664  | 5.952  |
| H | 4.330  | 3.128  | 5.444  | C                       | 5.849  | -1.042 | 5.527  |
| C | 6.787  | 5.547  | 7.804  | H                       | 5.521  | -1.113 | 4.004  |
| H | 7.731  | 5.035  | 7.621  | H                       | 6.432  | -1.784 | 6.060  |
| H | 6.080  | 4.782  | 8.130  | C                       | 4.383  | -1.093 | 5.904  |
| C | 6.230  | 6.189  | 6.534  | O                       | 3.962  | -2.139 | 6.477  |
| H | 5.276  | 6.705  | 6.708  | O                       | 3.658  | -0.088 | 5.642  |
| H | 6.906  | 6.948  | 6.123  | O                       | 6.589  | 3.796  | 2.780  |
| C | 5.979  | 5.170  | 5.419  | H                       | 6.109  | 4.563  | 3.238  |
| O | 6.304  | 3.945  | 5.617  | H                       | 7.243  | 4.156  | 2.143  |
| O | 5.460  | 5.580  | 4.344  | O                       | 8.791  | 1.626  | 3.127  |
| C | 10.040 | 0.655  | 10.331 | H                       | 9.654  | 2.062  | 3.317  |
| O | 11.118 | 0.836  | 10.916 | H                       | 8.908  | 1.175  | 2.269  |
| N | 9.950  | 0.262  | 9.052  | O                       | 5.080  | -0.544 | 3.111  |
| H | 9.053  | 0.138  | 8.588  | H                       | 5.492  | -0.689 | 2.219  |
| C | 11.133 | 0.045  | 8.236  | H                       | 5.395  | 0.374  | 3.539  |
| H | 10.814 | -0.494 | 7.340  |                         |        |        |        |
| H | 11.874 | -0.548 | 8.777  | <b>E-A<sub>1W</sub></b> |        |        |        |
| C | 11.827 | 1.353  | 7.849  | C                       | 9.502  | 5.485  | 0.335  |
| O | 13.026 | 1.533  | 8.044  | H                       | 9.357  | 6.521  | 0.668  |
| N | 11.000 | 2.323  | 7.347  | H                       | 9.562  | 5.494  | -0.760 |
| H | 10.046 | 2.084  | 7.080  | O                       | 8.410  | 4.659  | 0.755  |
| C | 11.512 | 3.632  | 6.948  | H                       | 7.664  | 4.919  | 0.153  |
| H | 12.463 | 3.497  | 6.425  | C                       | 12.394 | 0.632  | 2.328  |
| C | 10.526 | 4.440  | 6.102  | H                       | 13.226 | 1.259  | 2.670  |
| H | 9.591  | 4.638  | 6.635  | H                       | 11.603 | 0.734  | 3.076  |
| H | 10.965 | 5.421  | 5.870  | C                       | 12.826 | -0.825 | 2.223  |



|   |        |        |        |   |        |        |        |
|---|--------|--------|--------|---|--------|--------|--------|
| C | 14.053 | -1.189 | 1.654  | H | 6.580  | 7.185  | 2.265  |
| H | 14.727 | -0.418 | 1.296  | C | 2.179  | 4.056  | 6.635  |
| C | 14.410 | -2.532 | 1.528  | H | 3.158  | 4.520  | 6.775  |
| H | 15.357 | -2.792 | 1.066  | H | 1.858  | 3.651  | 7.602  |
| C | 13.550 | -3.536 | 1.977  | C | 2.221  | 2.868  | 5.683  |
| H | 13.819 | -4.583 | 1.854  | O | 1.201  | 2.249  | 5.364  |
| C | 11.982 | -1.842 | 2.693  | N | 3.450  | 2.497  | 5.221  |
| H | 11.030 | -1.570 | 3.145  | H | 3.530  | 1.522  | 4.932  |
| C | 12.339 | -3.186 | 2.575  | H | 4.304  | 2.940  | 5.556  |
| H | 11.670 | -3.962 | 2.942  | C | 6.783  | 5.486  | 7.803  |
| C | 0.242  | 2.894  | 0.589  | H | 7.728  | 4.972  | 7.631  |
| H | 0.770  | 3.458  | -0.187 | H | 6.076  | 4.729  | 8.148  |
| H | -0.410 | 3.609  | 1.102  | C | 6.222  | 6.096  | 6.519  |
| C | 1.252  | 2.357  | 1.605  | H | 5.270  | 6.617  | 6.689  |
| H | 1.690  | 3.208  | 2.133  | H | 6.896  | 6.844  | 6.090  |
| H | 0.789  | 1.736  | 2.380  | C | 5.959  | 5.063  | 5.416  |
| N | 2.344  | 1.636  | 0.930  | O | 6.261  | 3.829  | 5.617  |
| H | 2.132  | 1.240  | 0.005  | O | 5.456  | 5.481  | 4.337  |
| C | 3.622  | 2.034  | 1.014  | C | 10.075 | 0.646  | 10.427 |
| N | 4.092  | 2.696  | 2.059  | O | 11.140 | 0.818  | 11.037 |
| H | 5.068  | 3.020  | 2.079  | N | 10.005 | 0.266  | 9.144  |
| H | 3.574  | 2.774  | 2.928  | H | 9.114  | 0.150  | 8.667  |
| N | 4.452  | 1.730  | -0.024 | C | 11.193 | 0.050  | 8.335  |
| H | 5.122  | 2.521  | -0.215 | H | 10.885 | -0.518 | 7.453  |
| H | 3.902  | 1.465  | -0.858 | H | 11.944 | -0.515 | 8.891  |
| C | 6.039  | 9.819  | 3.782  | C | 11.862 | 1.360  | 7.916  |
| H | 5.631  | 9.997  | 2.785  | O | 13.052 | 1.577  | 8.130  |
| H | 6.463  | 10.749 | 4.166  | N | 11.021 | 2.297  | 7.373  |
| N | 8.148  | 8.812  | 4.685  | H | 10.081 | 2.026  | 7.088  |
| C | 7.102  | 8.757  | 3.777  | C | 11.503 | 3.615  | 6.958  |
| C | 8.832  | 7.696  | 4.526  | H | 12.453 | 3.497  | 6.428  |
| H | 9.716  | 7.412  | 5.073  | C | 10.492 | 4.393  | 6.114  |
| N | 8.304  | 6.930  | 3.533  | H | 9.555  | 4.566  | 6.652  |
| H | 8.567  | 5.966  | 3.355  | H | 10.902 | 5.384  | 5.878  |
| C | 7.195  | 7.595  | 3.048  | C | 10.118 | 3.785  | 4.762  |

|                           |        |        |        |   |        |        |        |
|---------------------------|--------|--------|--------|---|--------|--------|--------|
| O                         | 10.932 | 3.075  | 4.117  | H | 14.830 | -0.513 | 1.447  |
| O                         | 8.941  | 4.069  | 4.353  | C | 14.397 | -2.611 | 1.649  |
| Mg                        | 7.467  | 2.701  | 4.366  | H | 15.347 | -2.916 | 1.221  |
| C                         | 7.801  | 0.475  | 6.263  | C | 13.470 | -3.574 | 2.050  |
| O                         | 6.129  | 0.865  | 4.585  | H | 13.687 | -4.631 | 1.926  |
| O                         | 8.292  | -0.316 | 7.097  | C | 11.958 | -1.808 | 2.708  |
| C                         | 6.469  | 0.103  | 5.657  | H | 10.992 | -1.477 | 3.089  |
| O                         | 8.274  | 1.600  | 5.913  | C | 12.252 | -3.167 | 2.596  |
| C                         | 5.668  | -0.837 | 6.203  | H | 11.527 | -3.915 | 2.914  |
| H                         | 6.761  | -0.624 | 2.415  | C | 0.140  | 2.812  | 0.453  |
| H                         | 6.045  | -1.401 | 7.046  | H | 0.699  | 3.371  | -0.305 |
| C                         | 4.281  | -1.054 | 5.760  | H | -0.485 | 3.540  | 0.979  |
| O                         | 3.540  | -1.853 | 6.422  | C | 1.095  | 2.187  | 1.459  |
| O                         | 3.870  | -0.384 | 4.748  | H | 1.539  | 2.974  | 2.075  |
| O                         | 6.569  | 3.709  | 2.779  | H | 0.579  | 1.517  | 2.155  |
| H                         | 6.098  | 4.481  | 3.245  | N | 2.204  | 1.496  | 0.781  |
| H                         | 7.215  | 4.069  | 2.134  | H | 2.092  | 1.240  | -0.213 |
| O                         | 8.780  | 1.564  | 3.117  | C | 3.471  | 1.751  | 1.120  |
| H                         | 9.643  | 1.989  | 3.336  | N | 3.776  | 2.118  | 2.354  |
| H                         | 8.897  | 1.177  | 2.228  | H | 4.718  | 2.461  | 2.589  |
| O                         | 5.819  | -0.785 | 2.283  | H | 3.152  | 1.800  | 3.103  |
| H                         | 5.722  | -0.922 | 1.315  | N | 4.440  | 1.598  | 0.160  |
| H                         | 5.267  | 0.478  | 4.242  | H | 5.132  | 2.386  | 0.155  |
|                           |        |        |        | H | 4.012  | 1.477  | -0.765 |
| <b>TS<sub>2W-1A</sub></b> |        |        |        | C | 5.987  | 9.727  | 3.732  |
| C                         | 9.699  | 5.455  | 0.205  | H | 5.519  | 9.965  | 2.774  |
| H                         | 9.615  | 6.537  | 0.372  | H | 6.474  | 10.625 | 4.121  |
| H                         | 9.697  | 5.288  | -0.881 | N | 8.097  | 8.551  | 4.428  |
| O                         | 8.641  | 4.758  | 0.852  | C | 6.999  | 8.625  | 3.590  |
| H                         | 7.818  | 5.057  | 0.390  | C | 8.728  | 7.434  | 4.107  |
| C                         | 12.491 | 0.645  | 2.350  | H | 9.629  | 7.067  | 4.571  |
| H                         | 13.338 | 1.253  | 2.685  | N | 8.107  | 6.794  | 3.082  |
| H                         | 11.689 | 0.801  | 3.077  | H | 8.360  | 5.894  | 2.678  |
| C                         | 12.872 | -0.828 | 2.286  | C | 7.003  | 7.542  | 2.742  |
| C                         | 14.105 | -1.252 | 1.772  | H | 6.322  | 7.230  | 1.970  |

|   |        |        |        |                             |        |        |        |
|---|--------|--------|--------|-----------------------------|--------|--------|--------|
| C | 2.436  | 4.149  | 7.185  | O                           | 8.811  | 3.958  | 4.356  |
| H | 3.381  | 4.690  | 7.283  | Mg                          | 7.355  | 2.573  | 4.233  |
| H | 2.101  | 3.880  | 8.194  | C                           | 7.381  | 0.473  | 6.234  |
| C | 2.578  | 2.843  | 6.435  | O                           | 6.112  | 0.810  | 4.196  |
| O | 1.578  | 2.119  | 6.237  | O                           | 7.623  | -0.264 | 7.225  |
| N | 3.803  | 2.473  | 6.039  | C                           | 6.201  | 0.099  | 5.310  |
| H | 3.889  | 1.577  | 5.574  | O                           | 8.028  | 1.508  | 5.898  |
| H | 4.644  | 3.057  | 6.062  | C                           | 5.369  | -0.890 | 5.756  |
| C | 6.788  | 5.418  | 7.787  | H                           | 6.829  | -2.394 | 4.545  |
| H | 7.720  | 4.878  | 7.616  | H                           | 5.550  | -1.219 | 6.775  |
| H | 6.063  | 4.671  | 8.123  | C                           | 4.146  | -1.457 | 5.128  |
| C | 6.263  | 6.060  | 6.502  | O                           | 4.234  | -2.123 | 4.020  |
| H | 5.340  | 6.631  | 6.671  | O                           | 3.035  | -1.339 | 5.712  |
| H | 6.978  | 6.772  | 6.076  | O                           | 6.145  | 3.523  | 2.748  |
| C | 5.952  | 5.041  | 5.396  | H                           | 5.775  | 4.337  | 3.234  |
| O | 6.258  | 3.807  | 5.580  | H                           | 6.253  | 3.742  | 1.794  |
| O | 5.390  | 5.462  | 4.350  | O                           | 8.747  | 1.638  | 2.951  |
| C | 10.030 | 0.596  | 10.199 | H                           | 9.578  | 2.148  | 3.093  |
| O | 11.172 | 0.736  | 10.663 | H                           | 8.900  | 1.036  | 2.199  |
| N | 9.785  | 0.228  | 8.933  | O                           | 6.807  | -0.726 | 2.334  |
| H | 8.835  | 0.161  | 8.556  | H                           | 6.244  | -0.807 | 1.524  |
| C | 10.873 | -0.013 | 8.002  | H                           | 6.435  | -0.019 | 3.002  |
| H | 10.439 | -0.476 | 7.111  | O                           | 6.547  | -2.721 | 3.671  |
| H | 11.617 | -0.685 | 8.437  | H                           | 6.757  | -1.736 | 2.925  |
| C | 11.625 | 1.266  | 7.620  | H                           | 5.414  | -2.489 | 3.790  |
| O | 12.845 | 1.352  | 7.716  |                             |        |        |        |
| N | 10.827 | 2.311  | 7.234  | <b>TS<sub>decar-I</sub></b> |        |        |        |
| H | 9.847  | 2.132  | 7.013  | C                           | 9.751  | 5.330  | 0.304  |
| C | 11.409 | 3.592  | 6.837  | H                           | 9.624  | 6.394  | 0.543  |
| H | 12.349 | 3.397  | 6.312  | H                           | 9.765  | 5.235  | -0.791 |
| C | 10.470 | 4.445  | 5.980  | O                           | 8.706  | 4.554  | 0.881  |
| H | 9.564  | 4.732  | 6.521  | H                           | 7.881  | 4.875  | 0.434  |
| H | 10.987 | 5.374  | 5.706  | C                           | 12.514 | 0.541  | 2.440  |
| C | 10.030 | 3.795  | 4.663  | H                           | 13.393 | 1.132  | 2.721  |
| O | 10.868 | 3.166  | 3.958  | H                           | 11.749 | 0.746  | 3.195  |
|   |        |        |        | C                           | 12.845 | -0.945 | 2.397  |
|   |        |        |        | C                           | 13.981 | -1.434 | 1.733  |
|   |        |        |        | H                           | 14.673 | -0.735 | 1.272  |

|   |        |        |        |    |        |        |        |
|---|--------|--------|--------|----|--------|--------|--------|
| C | 14.213 | -2.806 | 1.636  | H  | 6.050  | 4.825  | 8.165  |
| H | 15.087 | -3.164 | 1.099  | C  | 6.289  | 6.244  | 6.571  |
| C | 13.317 | -3.717 | 2.201  | H  | 5.380  | 6.836  | 6.734  |
| H | 13.484 | -4.786 | 2.093  | H  | 7.033  | 6.941  | 6.166  |
| C | 11.976 | -1.871 | 2.993  | C  | 5.968  | 5.237  | 5.463  |
| H | 11.104 | -1.506 | 3.532  | O  | 6.440  | 4.049  | 5.570  |
| C | 12.204 | -3.244 | 2.896  | O  | 5.230  | 5.601  | 4.509  |
| H | 11.506 | -3.940 | 3.356  | C  | 10.012 | 0.619  | 10.315 |
| C | 0.127  | 2.851  | 0.335  | O  | 11.127 | 0.737  | 10.847 |
| H | 0.715  | 3.365  | -0.432 | N  | 9.837  | 0.288  | 9.028  |
| H | -0.502 | 3.612  | 0.809  | H  | 8.912  | 0.256  | 8.589  |
| C | 1.029  | 2.260  | 1.406  | C  | 10.981 | 0.059  | 8.158  |
| H | 1.454  | 3.073  | 2.002  | H  | 10.617 | -0.459 | 7.266  |
| H | 0.464  | 1.640  | 2.109  | H  | 11.726 | -0.557 | 8.665  |
| N | 2.150  | 1.506  | 0.824  | C  | 11.687 | 1.362  | 7.771  |
| H | 2.078  | 1.229  | -0.171 | O  | 12.884 | 1.545  | 7.985  |
| C | 3.412  | 1.759  | 1.201  | N  | 10.859 | 2.321  | 7.258  |
| N | 3.687  | 2.173  | 2.426  | H  | 9.913  | 2.065  | 6.967  |
| H | 4.620  | 2.534  | 2.680  | C  | 11.332 | 3.644  | 6.854  |
| H | 2.961  | 2.127  | 3.138  | H  | 12.270 | 3.541  | 6.300  |
| N | 4.408  | 1.546  | 0.283  | C  | 10.287 | 4.366  | 6.001  |
| H | 5.097  | 2.335  | 0.276  | H  | 9.304  | 4.362  | 6.477  |
| H | 3.995  | 1.436  | -0.649 | H  | 10.572 | 5.417  | 5.867  |
| C | 5.979  | 9.741  | 3.702  | C  | 10.130 | 3.813  | 4.572  |
| H | 5.525  | 9.899  | 2.721  | O  | 11.103 | 3.292  | 3.998  |
| H | 6.430  | 10.677 | 4.041  | O  | 8.974  | 3.997  | 4.040  |
| N | 8.131  | 8.741  | 4.510  | Mg | 7.378  | 2.764  | 4.182  |
| C | 7.036  | 8.671  | 3.666  | C  | 7.555  | 0.629  | 6.158  |
| C | 8.812  | 7.624  | 4.323  | O  | 6.123  | 1.107  | 4.293  |
| H | 9.725  | 7.353  | 4.827  | O  | 7.766  | -0.084 | 7.171  |
| N | 8.229  | 6.842  | 3.376  | C  | 6.461  | 0.210  | 5.154  |
| H | 8.508  | 5.887  | 3.154  | O  | 8.187  | 1.683  | 5.828  |
| C | 7.094  | 7.498  | 2.948  | C  | 5.996  | -1.089 | 5.213  |
| H | 6.438  | 7.075  | 2.208  | H  | 5.691  | -1.548 | 4.283  |
| C | 2.690  | 4.081  | 7.297  | H  | 6.347  | -1.742 | 6.000  |
| H | 3.583  | 4.712  | 7.320  | C  | 3.369  | -1.685 | 4.430  |
| H | 2.377  | 3.892  | 8.329  | O  | 3.633  | -2.485 | 3.599  |
| C | 2.956  | 2.719  | 6.688  | O  | 2.721  | -0.995 | 5.140  |
| O | 2.123  | 1.792  | 6.828  | O  | 5.984  | 3.726  | 2.806  |
| N | 4.092  | 2.541  | 6.004  | H  | 5.599  | 4.515  | 3.298  |
| H | 4.294  | 1.632  | 5.606  | H  | 6.026  | 3.907  | 1.838  |
| H | 4.851  | 3.223  | 5.911  | O  | 8.195  | 2.058  | 2.296  |
| C | 6.790  | 5.567  | 7.849  | H  | 8.678  | 2.866  | 2.038  |
| H | 7.718  | 5.022  | 7.680  | H  | 8.735  | 1.303  | 1.995  |

|                             |        |        |        |    |        |        |        |
|-----------------------------|--------|--------|--------|----|--------|--------|--------|
| <b>IM<sub>decar-I</sub></b> |        |        |        | H  | 8.362  | 5.929  | 2.641  |
| C                           | 9.766  | 5.404  | 0.240  | C  | 6.974  | 7.559  | 2.718  |
| H                           | 9.703  | 6.489  | 0.404  | H  | 6.293  | 7.238  | 1.950  |
| H                           | 9.756  | 5.240  | -0.847 | C  | 2.618  | 4.083  | 7.363  |
| O                           | 8.700  | 4.729  | 0.890  | H  | 3.501  | 4.717  | 7.476  |
| H                           | 7.886  | 5.000  | 0.394  | H  | 2.249  | 3.827  | 8.360  |
| C                           | 12.559 | 0.593  | 2.417  | C  | 2.941  | 2.777  | 6.670  |
| H                           | 13.427 | 1.202  | 2.692  | O  | 2.151  | 1.802  | 6.748  |
| H                           | 11.794 | 0.784  | 3.175  | N  | 4.071  | 2.711  | 5.968  |
| C                           | 12.920 | -0.887 | 2.372  | H  | 4.331  | 1.876  | 5.449  |
| C                           | 14.080 | -1.347 | 1.732  | H  | 4.783  | 3.439  | 5.931  |
| H                           | 14.771 | -0.630 | 1.299  | C  | 6.831  | 5.597  | 7.879  |
| C                           | 14.340 | -2.713 | 1.623  | H  | 7.758  | 5.047  | 7.722  |
| H                           | 15.234 | -3.047 | 1.104  | H  | 6.079  | 4.860  | 8.175  |
| C                           | 13.449 | -3.648 | 2.155  | C  | 6.358  | 6.290  | 6.600  |
| H                           | 13.638 | -4.712 | 2.036  | H  | 5.448  | 6.882  | 6.754  |
| C                           | 12.054 | -1.837 | 2.936  | H  | 7.109  | 6.989  | 6.212  |
| H                           | 11.160 | -1.496 | 3.452  | C  | 6.051  | 5.290  | 5.481  |
| C                           | 12.311 | -3.205 | 2.829  | O  | 6.542  | 4.110  | 5.579  |
| H                           | 11.614 | -3.918 | 3.263  | O  | 5.296  | 5.649  | 4.538  |
| C                           | 0.189  | 2.958  | 0.181  | C  | 10.050 | 0.490  | 10.044 |
| H                           | 0.722  | 3.464  | -0.631 | O  | 11.178 | 0.636  | 10.540 |
| H                           | -0.428 | 3.720  | 0.670  | N  | 9.846  | 0.124  | 8.768  |
| C                           | 1.163  | 2.428  | 1.215  | H  | 8.913  | 0.055  | 8.355  |
| H                           | 1.597  | 3.272  | 1.759  | C  | 10.980 | -0.060 | 7.874  |
| H                           | 0.643  | 1.826  | 1.970  | H  | 10.600 | -0.513 | 6.955  |
| N                           | 2.273  | 1.675  | 0.618  | H  | 11.729 | -0.713 | 8.328  |
| H                           | 2.218  | 1.388  | -0.377 | C  | 11.681 | 1.269  | 7.567  |
| C                           | 3.515  | 1.805  | 1.097  | O  | 12.883 | 1.439  | 7.748  |
| N                           | 3.722  | 2.216  | 2.336  | N  | 10.831 | 2.257  | 7.154  |
| H                           | 4.666  | 2.426  | 2.674  | H  | 9.886  | 2.002  | 6.864  |
| H                           | 2.959  | 2.192  | 3.016  | C  | 11.296 | 3.590  | 6.786  |
| N                           | 4.581  | 1.486  | 0.289  | H  | 12.237 | 3.501  | 6.235  |
| H                           | 5.259  | 2.280  | 0.271  | C  | 10.255 | 4.308  | 5.927  |
| H                           | 4.274  | 1.271  | -0.663 | H  | 9.261  | 4.287  | 6.384  |
| C                           | 5.953  | 9.751  | 3.698  | H  | 10.527 | 5.362  | 5.800  |
| H                           | 5.468  | 9.969  | 2.743  | C  | 10.152 | 3.741  | 4.502  |
| H                           | 6.444  | 10.657 | 4.061  | O  | 11.164 | 3.269  | 3.952  |
| N                           | 8.073  | 8.591  | 4.385  | O  | 9.006  | 3.846  | 3.935  |
| C                           | 6.966  | 8.649  | 3.558  | Mg | 7.308  | 2.761  | 4.172  |
| C                           | 8.713  | 7.478  | 4.065  | C  | 7.446  | 0.489  | 5.968  |
| H                           | 9.623  | 7.124  | 4.523  | O  | 5.884  | 1.301  | 4.327  |
| N                           | 8.088  | 6.822  | 3.052  | O  | 7.702  | -0.316 | 6.896  |
|                             |        |        |        | C  | 6.150  | 0.318  | 5.138  |

|                              |        |        |        |   |        |        |        |
|------------------------------|--------|--------|--------|---|--------|--------|--------|
| O                            | 8.142  | 1.507  | 5.646  | H | 5.074  | 3.017  | 1.979  |
| C                            | 5.362  | -0.783 | 5.335  | H | 3.537  | 2.768  | 2.743  |
| H                            | 4.461  | -0.911 | 4.728  | N | 4.529  | 1.629  | -0.131 |
| H                            | 5.674  | -1.583 | 5.995  | H | 5.204  | 2.419  | -0.314 |
| C                            | 1.932  | -2.085 | 4.619  | H | 4.001  | 1.377  | -0.979 |
| O                            | 2.519  | -3.086 | 4.502  | C | 6.028  | 9.701  | 3.769  |
| O                            | 1.315  | -1.097 | 4.720  | H | 5.592  | 9.846  | 2.778  |
| O                            | 6.047  | 3.780  | 2.786  | H | 6.468  | 10.642 | 4.106  |
| H                            | 5.658  | 4.563  | 3.272  | N | 8.152  | 8.725  | 4.658  |
| H                            | 6.063  | 3.945  | 1.815  | C | 7.094  | 8.639  | 3.769  |
| O                            | 8.229  | 1.997  | 2.276  | C | 8.854  | 7.619  | 4.505  |
| H                            | 8.853  | 2.746  | 2.395  | H | 9.752  | 7.364  | 5.042  |
| H                            | 8.772  | 1.233  | 2.003  | N | 8.324  | 6.824  | 3.539  |
|                              |        |        |        | H | 8.630  | 5.870  | 3.348  |
| <b>TS<sub>decar-II</sub></b> |        |        |        | C | 7.197  | 7.465  | 3.057  |
| C                            | 9.491  | 5.463  | 0.292  | H | 6.591  | 7.045  | 2.272  |
| H                            | 9.347  | 6.505  | 0.607  | C | 2.456  | 4.026  | 6.957  |
| H                            | 9.555  | 5.458  | -0.803 | H | 3.323  | 4.648  | 7.200  |
| O                            | 8.393  | 4.650  | 0.719  | H | 2.085  | 3.572  | 7.879  |
| H                            | 7.664  | 4.876  | 0.086  | C | 2.878  | 2.888  | 6.043  |
| C                            | 12.651 | 0.732  | 2.297  | O | 2.436  | 1.735  | 6.203  |
| H                            | 13.461 | 1.416  | 2.576  | N | 3.765  | 3.163  | 5.058  |
| H                            | 11.896 | 0.824  | 3.082  | H | 4.344  | 2.375  | 4.757  |
| C                            | 13.157 | -0.700 | 2.191  | H | 4.220  | 4.081  | 4.980  |
| C                            | 14.289 | -1.022 | 1.429  | C | 6.902  | 5.546  | 7.982  |
| H                            | 14.845 | -0.230 | 0.943  | H | 7.849  | 5.026  | 7.841  |
| C                            | 14.691 | -2.346 | 1.271  | H | 6.175  | 4.789  | 8.287  |
| H                            | 15.558 | -2.569 | 0.658  | C | 6.408  | 6.200  | 6.691  |
| C                            | 13.971 | -3.380 | 1.872  | H | 5.464  | 6.742  | 6.825  |
| H                            | 14.265 | -4.414 | 1.712  | H | 7.125  | 6.936  | 6.308  |
| C                            | 12.471 | -1.743 | 2.830  | C | 6.172  | 5.178  | 5.583  |
| H                            | 11.613 | -1.512 | 3.455  | O | 6.774  | 4.067  | 5.626  |
| C                            | 12.869 | -3.072 | 2.670  | O | 5.342  | 5.493  | 4.658  |
| H                            | 12.309 | -3.865 | 3.162  | C | 9.992  | 0.519  | 10.210 |
| C                            | 0.247  | 2.835  | 0.486  | O | 11.077 | 0.678  | 10.789 |
| H                            | 0.746  | 3.424  | -0.292 | N | 9.885  | 0.163  | 8.921  |
| H                            | -0.399 | 3.530  | 1.032  | H | 8.983  | 0.090  | 8.452  |
| C                            | 1.292  | 2.285  | 1.456  | C | 11.070 | -0.028 | 8.096  |
| H                            | 1.715  | 3.128  | 2.009  | H | 10.752 | -0.539 | 7.182  |
| H                            | 0.855  | 1.618  | 2.208  | H | 11.809 | -0.636 | 8.621  |
| N                            | 2.385  | 1.618  | 0.744  | C | 11.756 | 1.300  | 7.755  |
| H                            | 2.182  | 1.226  | -0.189 | O | 12.937 | 1.514  | 8.014  |
| C                            | 3.668  | 1.979  | 0.870  | N | 10.919 | 2.244  | 7.226  |
| N                            | 4.121  | 2.628  | 1.930  | H | 10.002 | 1.956  | 6.886  |

|                              |        |        |        |   |        |        |        |
|------------------------------|--------|--------|--------|---|--------|--------|--------|
| C                            | 11.375 | 3.575  | 6.827  | H | 11.674 | -1.532 | 3.524  |
| H                            | 12.325 | 3.486  | 6.291  | C | 12.928 | -3.081 | 2.713  |
| C                            | 10.339 | 4.269  | 5.941  | H | 12.386 | -3.879 | 3.215  |
| H                            | 9.338  | 4.243  | 6.381  | C | 0.251  | 2.846  | 0.492  |
| H                            | 10.603 | 5.326  | 5.809  | H | 0.746  | 3.440  | -0.285 |
| C                            | 10.260 | 3.696  | 4.514  | H | -0.395 | 3.537  | 1.044  |
| O                            | 11.262 | 3.166  | 4.006  | C | 1.303  | 2.296  | 1.455  |
| O                            | 9.136  | 3.857  | 3.906  | H | 1.716  | 3.135  | 2.020  |
| Mg                           | 7.500  | 2.737  | 4.189  | H | 0.872  | 1.613  | 2.198  |
| C                            | 7.610  | 0.488  | 6.003  | N | 2.404  | 1.651  | 0.739  |
| O                            | 5.883  | 1.198  | 4.475  | H | 2.210  | 1.252  | -0.193 |
| O                            | 7.921  | -0.293 | 6.931  | C | 3.681  | 2.030  | 0.872  |
| C                            | 6.234  | 0.290  | 5.307  | N | 4.116  | 2.703  | 1.924  |
| O                            | 8.271  | 1.500  | 5.621  | H | 5.070  | 3.088  | 1.984  |
| C                            | 5.474  | -0.827 | 5.695  | H | 3.553  | 2.787  | 2.760  |
| H                            | 5.830  | -1.352 | 6.575  | N | 4.560  | 1.667  | -0.110 |
| H                            | 4.398  | -0.785 | 5.562  | H | 5.241  | 2.450  | -0.297 |
| C                            | 5.666  | -2.414 | 4.147  | H | 4.058  | 1.383  | -0.962 |
| O                            | 6.553  | -3.152 | 4.475  | C | 6.013  | 9.754  | 3.766  |
| O                            | 4.776  | -2.189 | 3.365  | H | 5.580  | 9.893  | 2.773  |
| O                            | 6.445  | 3.920  | 2.779  | H | 6.445  | 10.700 | 4.103  |
| H                            | 6.029  | 4.661  | 3.304  | N | 8.139  | 8.795  | 4.669  |
| H                            | 7.093  | 4.269  | 2.128  | C | 7.085  | 8.699  | 3.776  |
| O                            | 7.973  | 1.578  | 2.511  | C | 8.840  | 7.686  | 4.532  |
| H                            | 8.847  | 1.400  | 2.125  | H | 9.734  | 7.434  | 5.078  |
| H                            | 7.421  | 0.796  | 2.288  | N | 8.315  | 6.881  | 3.570  |
|                              |        |        |        | H | 8.607  | 5.915  | 3.415  |
|                              |        |        |        | C | 7.190  | 7.517  | 3.078  |
| <b>IM<sub>decar-II</sub></b> |        |        |        | H | 6.586  | 7.088  | 2.296  |
| C                            | 9.483  | 5.436  | 0.302  | C | 2.438  | 3.979  | 6.930  |
| H                            | 9.350  | 6.484  | 0.604  | H | 3.306  | 4.580  | 7.219  |
| H                            | 9.543  | 5.418  | -0.793 | H | 2.033  | 3.505  | 7.827  |
| O                            | 8.387  | 4.637  | 0.749  | H | 2.033  | 3.505  | 7.827  |
| H                            | 7.657  | 4.837  | 0.111  | C | 2.879  | 2.859  | 5.998  |
| C                            | 12.660 | 0.719  | 2.335  | O | 2.417  | 1.707  | 6.112  |
| H                            | 13.459 | 1.414  | 2.616  | N | 3.805  | 3.150  | 5.055  |
| H                            | 11.899 | 0.797  | 3.117  | H | 4.432  | 2.380  | 4.776  |
| C                            | 13.185 | -0.707 | 2.230  | H | 4.229  | 4.082  | 5.001  |
| C                            | 14.304 | -1.019 | 1.444  | C | 6.858  | 5.594  | 8.000  |
| H                            | 14.842 | -0.223 | 0.945  | H | 7.797  | 5.062  | 7.850  |
| C                            | 14.713 | -2.340 | 1.275  | H | 6.123  | 4.844  | 8.302  |
| H                            | 15.568 | -2.555 | 0.642  | C | 6.366  | 6.261  | 6.716  |
| C                            | 14.014 | -3.380 | 1.890  | H | 5.432  | 6.818  | 6.855  |
| H                            | 14.312 | -4.411 | 1.720  | H | 7.093  | 6.985  | 6.327  |
| C                            | 12.523 | -1.756 | 2.884  | C | 6.109  | 5.239  | 5.613  |

|                                   |        |        |        |   |        |        |        |
|-----------------------------------|--------|--------|--------|---|--------|--------|--------|
| O                                 | 6.667  | 4.108  | 5.685  | H | 9.596  | 6.376  | 0.527  |
| O                                 | 5.307  | 5.568  | 4.670  | H | 9.768  | 5.238  | -0.823 |
| C                                 | 9.983  | 0.553  | 10.260 | O | 8.689  | 4.527  | 0.822  |
| O                                 | 11.072 | 0.686  | 10.839 | H | 7.870  | 4.860  | 0.373  |
| N                                 | 9.863  | 0.205  | 8.971  | C | 12.527 | 0.553  | 2.429  |
| H                                 | 8.957  | 0.165  | 8.495  | H | 13.415 | 1.136  | 2.699  |
| C                                 | 11.033 | -0.003 | 8.132  | H | 11.770 | 0.772  | 3.188  |
| H                                 | 10.694 | -0.512 | 7.226  | C | 12.840 | -0.937 | 2.400  |
| H                                 | 11.773 | -0.617 | 8.649  | C | 13.962 | -1.449 | 1.731  |
| C                                 | 11.728 | 1.314  | 7.774  | H | 14.658 | -0.766 | 1.251  |
| O                                 | 12.914 | 1.518  | 8.026  | C | 14.178 | -2.825 | 1.655  |
| N                                 | 10.898 | 2.264  | 7.245  | H | 15.042 | -3.202 | 1.115  |
| H                                 | 9.975  | 1.986  | 6.908  | C | 13.279 | -3.717 | 2.244  |
| C                                 | 11.370 | 3.590  | 6.848  | H | 13.433 | -4.790 | 2.152  |
| H                                 | 12.316 | 3.491  | 6.307  | C | 11.968 | -1.843 | 3.022  |
| C                                 | 10.336 | 4.318  | 5.987  | H | 11.110 | -1.458 | 3.569  |
| H                                 | 9.351  | 4.338  | 6.463  | C | 12.179 | -3.221 | 2.945  |
| H                                 | 10.637 | 5.363  | 5.840  | H | 11.480 | -3.902 | 3.426  |
| C                                 | 10.154 | 3.752  | 4.571  | C | 0.137  | 2.693  | 0.594  |
| O                                 | 11.081 | 3.132  | 4.011  | H | 0.738  | 3.253  | -0.130 |
| O                                 | 9.022  | 4.005  | 4.024  | H | -0.504 | 3.425  | 1.095  |
| Mg                                | 7.385  | 2.771  | 4.274  | C | 1.042  | 2.043  | 1.639  |
| C                                 | 7.573  | 0.590  | 6.103  | H | 1.438  | 2.828  | 2.288  |
| O                                 | 5.907  | 1.202  | 4.423  | H | 0.499  | 1.350  | 2.292  |
| O                                 | 7.936  | -0.189 | 7.020  | N | 2.185  | 1.373  | 1.001  |
| C                                 | 6.211  | 0.371  | 5.431  | H | 2.061  | 1.040  | 0.032  |
| O                                 | 8.239  | 1.599  | 5.702  | C | 3.444  | 1.760  | 1.242  |
| C                                 | 5.436  | -0.622 | 5.931  | N | 3.787  | 2.335  | 2.383  |
| H                                 | 5.806  | -1.212 | 6.759  | H | 4.734  | 2.706  | 2.531  |
| H                                 | 4.425  | -0.807 | 5.589  | H | 3.191  | 2.292  | 3.197  |
| C                                 | 5.520  | -2.987 | 3.467  | N | 4.381  | 1.531  | 0.275  |
| O                                 | 6.515  | -3.440 | 3.884  | H | 5.060  | 2.321  | 0.194  |
| O                                 | 4.513  | -2.600 | 3.020  | H | 3.925  | 1.315  | -0.623 |
| O                                 | 6.412  | 3.968  | 2.810  | C | 5.975  | 9.745  | 3.734  |
| H                                 | 6.001  | 4.718  | 3.324  | H | 5.530  | 9.912  | 2.750  |
| H                                 | 7.098  | 4.298  | 2.189  |   |        |        |        |
| O                                 | 8.266  | 1.876  | 2.581  |   |        |        |        |
| H                                 | 9.228  | 1.988  | 2.589  |   |        |        |        |
| H                                 | 8.071  | 0.962  | 2.301  |   |        |        |        |
| <b>hydration decarboxylation:</b> |        |        |        |   |        |        |        |
| <b>R</b>                          |        |        |        |   |        |        |        |
| C                                 | 9.741  | 5.319  | 0.272  |   |        |        |        |



|   |        |        |        |                     |        |        |       |
|---|--------|--------|--------|---------------------|--------|--------|-------|
| H | 6.421  | 10.679 | 4.086  | N                   | 10.918 | 2.272  | 7.212 |
| N | 8.127  | 8.753  | 4.546  | H                   | 9.996  | 1.997  | 6.882 |
| C | 7.035  | 8.680  | 3.698  | C                   | 11.371 | 3.611  | 6.832 |
| C | 8.819  | 7.645  | 4.352  | H                   | 12.309 | 3.533  | 6.275 |
| H | 9.735  | 7.378  | 4.854  | C                   | 10.314 | 4.337  | 5.999 |
| N | 8.245  | 6.864  | 3.398  | H                   | 9.330  | 4.299  | 6.475 |
| H | 8.539  | 5.914  | 3.174  | H                   | 10.570 | 5.398  | 5.898 |
| C | 7.104  | 7.512  | 2.973  | C                   | 10.167 | 3.828  | 4.556 |
| H | 6.455  | 7.092  | 2.224  | O                   | 11.128 | 3.287  | 3.984 |
| C | 2.488  | 4.087  | 7.001  | O                   | 9.023  | 4.063  | 4.013 |
| H | 3.418  | 4.655  | 6.927  | Mg                  | 7.451  | 2.869  | 4.031 |
| H | 2.279  | 3.898  | 8.060  | C                   | 7.659  | 0.565  | 5.870 |
| C | 2.567  | 2.719  | 6.350  | O                   | 6.009  | 1.066  | 4.215 |
| O | 1.660  | 1.888  | 6.535  | O                   | 7.932  | -0.193 | 6.823 |
| N | 3.637  | 2.422  | 5.580  | C                   | 6.357  | 0.259  | 5.071 |
| H | 3.723  | 1.439  | 5.302  | O                   | 8.276  | 1.593  | 5.474 |
| H | 4.461  | 3.017  | 5.529  | C                   | 5.634  | -1.007 | 5.437 |
| C | 6.798  | 5.482  | 7.786  | H                   | 6.334  | -1.829 | 5.247 |
| H | 7.738  | 4.958  | 7.617  | H                   | 5.502  | -0.989 | 6.527 |
| H | 6.078  | 4.730  | 8.120  | C                   | 4.273  | -1.293 | 4.794 |
| C | 6.263  | 6.127  | 6.508  | O                   | 4.126  | -2.417 | 4.229 |
| H | 5.351  | 6.711  | 6.682  | O                   | 3.371  | -0.420 | 4.936 |
| H | 6.987  | 6.829  | 6.076  | O                   | 6.101  | 3.830  | 2.697 |
| C | 5.924  | 5.120  | 5.404  | H                   | 5.645  | 4.575  | 3.208 |
| O | 6.379  | 3.920  | 5.477  | H                   | 6.070  | 3.981  | 1.721 |
| O | 5.198  | 5.522  | 4.452  | O                   | 8.157  | 2.075  | 2.197 |
| C | 9.992  | 0.538  | 10.185 | H                   | 8.546  | 2.880  | 1.796 |
| O | 11.080 | 0.694  | 10.757 | H                   | 8.734  | 1.332  | 1.932 |
| N | 9.880  | 0.178  | 8.895  | O                   | 2.291  | -0.662 | 7.571 |
| H | 8.973  | 0.124  | 8.439  | H                   | 2.558  | -0.710 | 6.637 |
| C | 11.059 | -0.011 | 8.064  | H                   | 2.164  | 0.293  | 7.682 |
| H | 10.738 | -0.519 | 7.149  |                     |        |        |       |
| H | 11.797 | -0.625 | 8.583  |                     |        |        |       |
| C | 11.751 | 1.315  | 7.725  | <b>IM-hydration</b> |        |        |       |
| O | 12.937 | 1.515  | 7.972  | C                   | 9.767  | 5.380  | 0.233 |
|   |        |        |        | H                   | 9.603  | 6.426  | 0.521 |

|   |        |        |        |   |        |        |        |
|---|--------|--------|--------|---|--------|--------|--------|
| H | 9.805  | 5.333  | -0.864 | N | 8.145  | 8.822  | 4.578  |
| O | 8.728  | 4.554  | 0.746  | C | 7.039  | 8.649  | 3.766  |
| H | 7.890  | 4.884  | 0.329  | C | 8.880  | 7.733  | 4.437  |
| C | 12.605 | 0.592  | 2.326  | H | 9.815  | 7.538  | 4.935  |
| H | 13.480 | 1.177  | 2.630  | N | 8.320  | 6.867  | 3.554  |
| H | 11.831 | 0.781  | 3.075  | H | 8.666  | 5.921  | 3.381  |
| C | 12.941 | -0.892 | 2.260  | C | 7.141  | 7.437  | 3.117  |
| C | 14.140 | -1.354 | 1.699  | H | 6.502  | 6.943  | 2.406  |
| H | 14.868 | -0.639 | 1.331  | C | 2.404  | 4.078  | 7.174  |
| C | 14.396 | -2.722 | 1.592  | H | 3.300  | 4.700  | 7.269  |
| H | 15.322 | -3.058 | 1.135  | H | 2.096  | 3.754  | 8.170  |
| C | 13.463 | -3.655 | 2.050  | C | 2.722  | 2.825  | 6.385  |
| H | 13.654 | -4.719 | 1.940  | O | 2.212  | 1.722  | 6.705  |
| C | 12.024 | -1.840 | 2.742  | N | 3.571  | 2.949  | 5.358  |
| H | 11.091 | -1.496 | 3.182  | H | 3.909  | 2.099  | 4.926  |
| C | 12.281 | -3.208 | 2.641  | H | 4.039  | 3.830  | 5.116  |
| H | 11.550 | -3.923 | 3.012  | C | 6.870  | 5.563  | 7.833  |
| C | 0.349  | 2.642  | 0.569  | H | 7.816  | 5.052  | 7.656  |
| H | 0.879  | 3.221  | -0.196 | H | 6.158  | 4.798  | 8.156  |
| H | -0.242 | 3.360  | 1.148  | C | 6.332  | 6.218  | 6.557  |
| C | 1.354  | 1.979  | 1.513  | H | 5.400  | 6.766  | 6.728  |
| H | 1.868  | 2.739  | 2.109  | H | 7.053  | 6.936  | 6.148  |
| H | 0.859  | 1.321  | 2.234  | C | 6.053  | 5.177  | 5.468  |
| N | 2.397  | 1.262  | 0.748  | O | 6.831  | 4.181  | 5.382  |
| H | 2.227  | 1.098  | -0.259 | O | 5.043  | 5.358  | 4.711  |
| C | 3.693  | 1.397  | 1.038  | C | 9.997  | 0.552  | 10.131 |
| N | 4.100  | 1.589  | 2.290  | O | 11.079 | 0.684  | 10.721 |
| H | 5.095  | 1.732  | 2.430  | N | 9.899  | 0.218  | 8.834  |
| H | 3.710  | 0.974  | 3.031  | H | 9.002  | 0.193  | 8.354  |
| N | 4.612  | 1.315  | 0.018  | C | 11.088 | 0.034  | 8.015  |
| H | 5.250  | 2.142  | 0.040  | H | 10.775 | -0.462 | 7.092  |
| H | 4.136  | 1.262  | -0.890 | H | 11.816 | -0.587 | 8.540  |
| C | 5.947  | 9.683  | 3.757  | C | 11.793 | 1.359  | 7.698  |
| H | 5.486  | 9.788  | 2.771  | O | 12.973 | 1.552  | 7.979  |
| H | 6.378  | 10.642 | 4.053  | N | 10.978 | 2.321  | 7.166  |

|                           |        |        |        |   |        |        |        |
|---------------------------|--------|--------|--------|---|--------|--------|--------|
| H                         | 10.065 | 2.054  | 6.801  | O | 8.736  | 4.564  | 0.745  |
| C                         | 11.458 | 3.651  | 6.789  | H | 7.895  | 4.890  | 0.331  |
| H                         | 12.417 | 3.554  | 6.271  | C | 12.602 | 0.594  | 2.326  |
| C                         | 10.450 | 4.378  | 5.898  | H | 13.476 | 1.179  | 2.632  |
| H                         | 9.438  | 4.351  | 6.311  | H | 11.827 | 0.782  | 3.074  |
| H                         | 10.720 | 5.437  | 5.801  | C | 12.940 | -0.890 | 2.261  |
| C                         | 10.391 | 3.851  | 4.456  | C | 14.141 | -1.350 | 1.700  |
| O                         | 11.362 | 3.247  | 3.969  | H | 14.867 | -0.633 | 1.332  |
| O                         | 9.306  | 4.120  | 3.813  | C | 14.399 | -2.717 | 1.592  |
| Mg                        | 7.650  | 3.029  | 3.920  | H | 15.326 | -3.051 | 1.135  |
| C                         | 7.853  | 0.674  | 5.739  | C | 13.468 | -3.652 | 2.049  |
| O                         | 6.388  | 1.267  | 3.967  | H | 13.660 | -4.716 | 1.939  |
| O                         | 8.067  | -0.141 | 6.664  | C | 12.025 | -1.839 | 2.742  |
| C                         | 6.685  | 0.373  | 4.761  | H | 11.091 | -1.498 | 3.181  |
| O                         | 8.465  | 1.745  | 5.470  | C | 12.284 | -3.207 | 2.640  |
| C                         | 5.989  | -0.940 | 4.817  | H | 11.555 | -3.924 | 3.011  |
| H                         | 6.076  | -1.431 | 3.845  | C | 0.355  | 2.655  | 0.560  |
| H                         | 6.473  | -1.556 | 5.573  | H | 0.879  | 3.236  | -0.207 |
| C                         | 4.453  | -0.774 | 5.139  | H | -0.238 | 3.370  | 1.141  |
| O                         | 3.684  | -0.488 | 4.113  | C | 1.369  | 2.000  | 1.501  |
| O                         | 4.442  | 0.139  | 6.229  | H | 1.876  | 2.767  | 2.095  |
| O                         | 6.205  | 3.911  | 2.650  | H | 0.878  | 1.339  | 2.222  |
| H                         | 5.603  | 4.495  | 3.167  | N | 2.414  | 1.291  | 0.735  |
| H                         | 6.000  | 3.944  | 1.686  | H | 2.249  | 1.128  | -0.274 |
| O                         | 8.266  | 2.182  | 2.064  | C | 3.710  | 1.399  | 1.038  |
| H                         | 8.615  | 2.991  | 1.629  | N | 4.107  | 1.585  | 2.293  |
| H                         | 8.869  | 1.456  | 1.809  | H | 5.107  | 1.623  | 2.492  |
| O                         | 4.036  | -2.076 | 5.707  | H | 3.600  | 1.090  | 3.030  |
| H                         | 3.527  | 0.467  | 6.362  | N | 4.640  | 1.299  | 0.032  |
| H                         | 4.402  | -2.067 | 6.603  | H | 5.278  | 2.127  | 0.055  |
|                           |        |        |        | H | 4.174  | 1.245  | -0.880 |
|                           |        |        |        | C | 5.949  | 9.680  | 3.755  |
| <b>TS-decarboxylation</b> |        |        |        | H | 5.488  | 9.785  | 2.770  |
| C                         | 9.772  | 5.388  | 0.229  | H | 6.381  | 10.639 | 4.051  |
| H                         | 9.613  | 6.435  | 0.515  | N | 8.147  | 8.817  | 4.574  |
| H                         | 9.811  | 5.339  | -0.869 |   |        |        |        |

|   |        |        |        |                           |        |        |        |
|---|--------|--------|--------|---------------------------|--------|--------|--------|
| C | 7.038  | 8.644  | 3.765  | C                         | 11.447 | 3.650  | 6.789  |
| C | 8.877  | 7.724  | 4.435  | H                         | 12.404 | 3.554  | 6.267  |
| H | 9.813  | 7.527  | 4.932  | C                         | 10.434 | 4.375  | 5.902  |
| N | 8.313  | 6.857  | 3.557  | H                         | 9.423  | 4.343  | 6.319  |
| H | 8.651  | 5.906  | 3.388  | H                         | 10.700 | 5.435  | 5.805  |
| C | 7.135  | 7.429  | 3.120  | C                         | 10.368 | 3.848  | 4.460  |
| H | 6.494  | 6.933  | 2.412  | O                         | 11.344 | 3.259  | 3.964  |
| C | 2.409  | 4.075  | 7.163  | O                         | 9.276  | 4.107  | 3.828  |
| H | 3.297  | 4.705  | 7.272  | Mg                        | 7.621  | 2.990  | 3.937  |
| H | 2.093  | 3.744  | 8.154  | C                         | 7.822  | 0.668  | 5.772  |
| C | 2.760  | 2.829  | 6.378  | O                         | 6.452  | 1.226  | 3.905  |
| O | 2.264  | 1.714  | 6.693  | O                         | 8.009  | -0.130 | 6.721  |
| N | 3.634  | 2.963  | 5.376  | C                         | 6.765  | 0.306  | 4.701  |
| H | 4.027  | 2.122  | 4.975  | O                         | 8.418  | 1.762  | 5.546  |
| H | 4.082  | 3.859  | 5.133  | C                         | 6.202  | -0.981 | 4.681  |
| C | 6.869  | 5.567  | 7.833  | H                         | 6.062  | -1.393 | 3.686  |
| H | 7.813  | 5.052  | 7.656  | H                         | 6.662  | -1.675 | 5.378  |
| H | 6.155  | 4.804  | 8.155  | C                         | 4.314  | -0.796 | 5.198  |
| C | 6.334  | 6.226  | 6.558  | O                         | 3.598  | -0.535 | 4.174  |
| H | 5.406  | 6.781  | 6.732  | O                         | 4.400  | 0.103  | 6.250  |
| H | 7.058  | 6.938  | 6.146  | O                         | 6.201  | 3.913  | 2.658  |
| C | 6.039  | 5.184  | 5.476  | H                         | 5.599  | 4.503  | 3.162  |
| O | 6.803  | 4.180  | 5.389  | H                         | 6.000  | 3.936  | 1.692  |
| O | 5.020  | 5.369  | 4.728  | O                         | 8.283  | 2.197  | 2.060  |
| C | 9.997  | 0.550  | 10.131 | H                         | 8.657  | 3.007  | 1.651  |
| O | 11.080 | 0.679  | 10.720 | H                         | 8.871  | 1.460  | 1.803  |
| N | 9.894  | 0.219  | 8.833  | O                         | 4.072  | -2.102 | 5.730  |
| H | 8.996  | 0.201  | 8.349  | H                         | 3.518  | 0.532  | 6.387  |
| C | 11.083 | 0.034  | 8.015  | H                         | 4.519  | -2.101 | 6.588  |
| H | 10.771 | -0.464 | 7.093  |                           |        |        |        |
| H | 11.813 | -0.585 | 8.541  |                           |        |        |        |
| C | 11.786 | 1.359  | 7.694  | <b>IM-decarboxylation</b> |        |        |        |
| O | 12.969 | 1.551  | 7.968  | C                         | 9.688  | 5.450  | 0.259  |
| N | 10.969 | 2.320  | 7.167  | H                         | 9.536  | 6.496  | 0.553  |
| H | 10.046 | 2.058  | 6.817  | H                         | 9.722  | 5.410  | -0.838 |
|   |        |        |        | O                         | 8.645  | 4.629  | 0.775  |

|   |        |        |        |   |        |        |        |
|---|--------|--------|--------|---|--------|--------|--------|
| H | 7.800  | 4.965  | 0.373  | C | 8.831  | 7.631  | 4.366  |
| C | 12.486 | 0.639  | 2.321  | H | 9.760  | 7.389  | 4.855  |
| H | 13.335 | 1.248  | 2.652  | N | 8.230  | 6.806  | 3.470  |
| H | 11.691 | 0.798  | 3.055  | H | 8.520  | 5.849  | 3.265  |
| C | 12.871 | -0.831 | 2.249  | C | 7.073  | 7.432  | 3.054  |
| C | 14.086 | -1.249 | 1.687  | H | 6.417  | 6.975  | 2.336  |
| H | 14.787 | -0.507 | 1.318  | C | 2.538  | 4.191  | 6.988  |
| C | 14.395 | -2.606 | 1.579  | H | 3.391  | 4.876  | 7.024  |
| H | 15.332 | -2.906 | 1.120  | H | 2.287  | 3.883  | 8.006  |
| C | 13.500 | -3.573 | 2.042  | C | 2.932  | 2.924  | 6.261  |
| H | 13.731 | -4.630 | 1.933  | O | 2.484  | 1.823  | 6.682  |
| C | 11.992 | -1.813 | 2.732  | N | 3.789  | 3.018  | 5.242  |
| H | 11.046 | -1.505 | 3.172  | H | 4.309  | 2.197  | 4.927  |
| C | 12.302 | -3.171 | 2.634  | H | 4.206  | 3.932  | 4.999  |
| H | 11.601 | -3.913 | 3.010  | C | 6.834  | 5.579  | 7.862  |
| C | 0.481  | 2.891  | 0.211  | H | 7.767  | 5.038  | 7.703  |
| H | 0.909  | 3.404  | -0.657 | H | 6.086  | 4.836  | 8.153  |
| H | -0.078 | 3.649  | 0.770  | C | 6.354  | 6.276  | 6.584  |
| C | 1.612  | 2.400  | 1.108  | H | 5.460  | 6.886  | 6.749  |
| H | 2.106  | 3.289  | 1.520  | H | 7.125  | 6.946  | 6.186  |
| H | 1.233  | 1.822  | 1.964  | C | 6.008  | 5.259  | 5.496  |
| N | 2.622  | 1.612  | 0.399  | O | 6.706  | 4.210  | 5.406  |
| H | 2.492  | 1.379  | -0.606 | O | 4.997  | 5.502  | 4.750  |
| C | 3.785  | 1.306  | 0.972  | C | 9.951  | 0.402  | 9.906  |
| N | 4.036  | 1.631  | 2.227  | O | 11.081 | 0.554  | 10.386 |
| H | 4.948  | 1.439  | 2.736  | N | 9.736  | 0.053  | 8.622  |
| H | 3.422  | 2.280  | 2.694  | H | 8.794  | -0.009 | 8.246  |
| N | 4.717  | 0.561  | 0.289  | C | 10.862 | -0.108 | 7.713  |
| H | 5.669  | 0.850  | 0.496  | H | 10.478 | -0.522 | 6.777  |
| H | 4.530  | 0.399  | -0.713 | H | 11.602 | -0.791 | 8.138  |
| C | 5.965  | 9.703  | 3.753  | C | 11.591 | 1.217  | 7.452  |
| H | 5.513  | 9.855  | 2.770  | O | 12.803 | 1.334  | 7.591  |
| H | 6.422  | 10.639 | 4.082  | N | 10.762 | 2.249  | 7.113  |
| N | 8.141  | 8.745  | 4.535  | H | 9.801  | 2.035  | 6.850  |
| C | 7.022  | 8.633  | 3.729  | C | 11.269 | 3.571  | 6.752  |

|                                         |        |        |       |   |        |        |       |
|-----------------------------------------|--------|--------|-------|---|--------|--------|-------|
| H                                       | 12.213 | 3.449  | 6.213 | H | 5.195  | 6.915  | 4.440 |
| C                                       | 10.263 | 4.317  | 5.878 | C | 8.764  | 3.623  | 9.030 |
| H                                       | 9.255  | 4.311  | 6.303 | H | 9.230  | 4.362  | 9.692 |
| H                                       | 10.556 | 5.368  | 5.769 | H | 7.692  | 3.647  | 9.246 |
| C                                       | 10.190 | 3.761  | 4.444 | C | 9.327  | 2.232  | 9.290 |
| O                                       | 11.199 | 3.230  | 3.945 | C | 10.707 | 1.993  | 9.383 |
| O                                       | 9.079  | 3.935  | 3.826 | H | 11.402 | 2.824  | 9.297 |
| Mg                                      | 7.347  | 2.953  | 3.894 | C | 11.194 | 0.698  | 9.565 |
| C                                       | 7.406  | 0.421  | 5.552 | H | 12.267 | 0.533  | 9.615 |
| O                                       | 6.024  | 1.386  | 3.883 | C | 10.315 | -0.383 | 9.659 |
| O                                       | 7.401  | -0.480 | 6.468 | H | 10.702 | -1.393 | 9.775 |
| C                                       | 6.551  | 0.248  | 4.305 | C | 8.456  | 1.139  | 9.415 |
| O                                       | 8.075  | 1.486  | 5.576 | H | 7.382  | 1.315  | 9.367 |
| C                                       | 6.498  | -0.947 | 3.672 | C | 8.940  | -0.158 | 9.598 |
| H                                       | 6.073  | -1.023 | 2.672 | H | 8.243  | -0.989 | 9.690 |
| H                                       | 6.996  | -1.815 | 4.085 | C | -0.813 | 3.132  | 0.612 |
| C                                       | 4.163  | -1.152 | 6.552 | H | -0.067 | 3.839  | 0.233 |
| O                                       | 3.026  | -1.679 | 6.543 | H | -1.767 | 3.665  | 0.615 |
| O                                       | 4.355  | 0.142  | 6.520 | C | -0.476 | 2.745  | 2.045 |
| O                                       | 6.081  | 4.067  | 2.627 | H | -0.658 | 3.619  | 2.678 |
| H                                       | 5.535  | 4.701  | 3.137 | H | -1.117 | 1.942  | 2.431 |
| H                                       | 5.773  | 4.014  | 1.682 | N | 0.942  | 2.384  | 2.161 |
| O                                       | 7.989  | 2.151  | 1.941 | H | 1.436  | 2.044  | 1.315 |
| H                                       | 8.368  | 2.971  | 1.558 | C | 1.764  | 2.944  | 3.044 |
| H                                       | 8.639  | 1.452  | 1.728 | N | 1.312  | 3.503  | 4.164 |
| O                                       | 5.251  | -1.874 | 6.587 | H | 1.919  | 4.118  | 4.733 |
| H                                       | 3.499  | 0.703  | 6.579 | H | 0.321  | 3.612  | 4.311 |
| H                                       | 6.109  | -1.283 | 6.518 | N | 3.109  | 2.888  | 2.808 |
|                                         |        |        |       | H | 3.552  | 3.816  | 3.008 |
|                                         |        |        |       | H | 3.283  | 2.579  | 1.840 |
|                                         |        |        |       | C | 0.777  | 11.090 | 5.880 |
|                                         |        |        |       | H | 0.921  | 11.209 | 4.804 |
|                                         |        |        |       | H | 0.734  | 12.079 | 6.344 |
|                                         |        |        |       | N | 2.282  | 10.561 | 7.814 |
|                                         |        |        |       | C | 1.890  | 10.301 | 6.512 |
| <b>proton-assisted decarboxylation:</b> |        |        |       |   |        |        |       |
| <b>R</b>                                |        |        |       |   |        |        |       |
| C                                       | 6.665  | 7.775  | 5.350 |   |        |        |       |
| H                                       | 6.180  | 8.756  | 5.407 |   |        |        |       |
| H                                       | 7.292  | 7.760  | 4.450 |   |        |        |       |
| O                                       | 5.674  | 6.740  | 5.293 |   |        |        |       |

|   |        |       |        |           |       |        |        |
|---|--------|-------|--------|-----------|-------|--------|--------|
| C | 3.206  | 9.665 | 8.109  | H         | 5.959 | 6.242  | 11.963 |
| H | 3.731  | 9.586 | 9.047  | C         | 4.323 | 6.697  | 10.612 |
| N | 3.452  | 8.844 | 7.053  | H         | 3.255 | 6.488  | 10.493 |
| H | 4.054  | 8.026 | 7.085  | H         | 4.425 | 7.790  | 10.601 |
| C | 2.619  | 9.240 | 6.025  | C         | 5.055 | 6.218  | 9.354  |
| H | 2.611  | 8.742 | 5.071  | O         | 6.247 | 5.884  | 9.410  |
| C | -2.666 | 4.540 | 7.281  | O         | 4.349 | 6.246  | 8.273  |
| H | -2.085 | 5.309 | 7.797  | Mg        | 3.355 | 4.807  | 7.462  |
| H | -3.407 | 4.140 | 7.978  | C         | 2.895 | 2.239  | 9.099  |
| C | -1.813 | 3.373 | 6.840  | O         | 2.329 | 2.312  | 6.765  |
| O | -2.317 | 2.283 | 6.517  | O         | 2.775 | 1.531  | 10.117 |
| N | -0.474 | 3.551 | 6.804  | C         | 2.332 | 1.626  | 7.786  |
| H | 0.074  | 2.737 | 6.574  | O         | 3.360 | 3.401  | 8.970  |
| H | 0.036  | 4.340 | 7.205  | C         | 1.761 | 0.227  | 7.828  |
| C | 0.199  | 6.934 | 10.065 | H         | 2.571 | -0.462 | 8.101  |
| H | 1.161  | 6.622 | 10.470 | H         | 1.052 | 0.156  | 8.662  |
| H | -0.424 | 6.038 | 10.002 | C         | 1.085 | -0.303 | 6.570  |
| C | 0.332  | 7.526 | 8.662  | O         | 0.642 | -1.436 | 6.511  |
| H | -0.624 | 7.892 | 8.269  | O         | 0.977 | 0.508  | 5.513  |
| H | 1.008  | 8.389 | 8.647  | H         | 1.531 | 1.321  | 5.674  |
| C | 0.869  | 6.536 | 7.630  | O         | 2.705 | 5.428  | 5.544  |
| O | 1.450  | 5.450 | 8.020  | H         | 1.915 | 6.055  | 5.690  |
| O | 0.712  | 6.805 | 6.407  | H         | 3.191 | 5.630  | 4.705  |
| C | 2.674  | 2.609 | 14.107 | O         | 5.020 | 4.203  | 6.334  |
| O | 3.259  | 2.976 | 15.132 | H         | 5.384 | 5.070  | 6.045  |
| N | 3.318  | 2.292 | 12.966 | H         | 5.799 | 3.637  | 6.512  |
| H | 2.802  | 2.037 | 12.131 |           |       |        |        |
| C | 4.766  | 2.412 | 12.880 | <b>TS</b> |       |        |        |
| H | 5.089  | 1.926 | 11.955 | C         | 6.674 | 7.831  | 5.334  |
| H | 5.241  | 1.921 | 13.731 | H         | 6.213 | 8.825  | 5.367  |
| C | 5.242  | 3.871 | 12.900 | H         | 7.300 | 7.779  | 4.434  |
| O | 6.142  | 4.253 | 13.636 | O         | 5.657 | 6.820  | 5.308  |
| N | 4.548  | 4.709 | 12.066 | H         | 5.184 | 6.977  | 4.447  |
| H | 3.881  | 4.310 | 11.417 | C         | 8.883 | 3.873  | 9.176  |
| C | 4.873  | 6.125 | 11.917 | H         | 9.421 | 4.651  | 9.731  |

|   |        |        |        |   |        |       |        |
|---|--------|--------|--------|---|--------|-------|--------|
| H | 7.835  | 3.972  | 9.469  | H | 4.092  | 7.991 | 6.790  |
| C | 9.394  | 2.492  | 9.560  | C | 2.617  | 9.249 | 5.865  |
| C | 10.633 | 1.976  | 9.147  | H | 2.584  | 8.806 | 4.886  |
| H | 11.316 | 2.601  | 8.576  | C | -2.545 | 4.528 | 7.261  |
| C | 10.984 | 0.655  | 9.428  | H | -1.927 | 5.309 | 7.711  |
| H | 11.932 | 0.265  | 9.073  | H | -3.274 | 4.195 | 8.007  |
| C | 10.107 | -0.176 | 10.125 | C | -1.746 | 3.294 | 6.888  |
| H | 10.351 | -1.224 | 10.273 | O | -2.320 | 2.236 | 6.574  |
| C | 8.569  | 1.676  | 10.354 | N | -0.397 | 3.376 | 6.928  |
| H | 7.657  | 2.099  | 10.770 | H | 0.113  | 2.510 | 6.796  |
| C | 8.915  | 0.349  | 10.627 | H | 0.119  | 4.169 | 7.318  |
| H | 8.249  | -0.275 | 11.218 | C | 0.172  | 6.956 | 10.017 |
| C | -0.796 | 3.022  | 0.717  | H | 1.148  | 6.655 | 10.396 |
| H | -0.024 | 3.726  | 0.389  | H | -0.438 | 6.051 | 9.963  |
| H | -1.739 | 3.576  | 0.710  | C | 0.265  | 7.550 | 8.611  |
| C | -0.518 | 2.555  | 2.144  | H | -0.707 | 7.888 | 8.232  |
| H | -0.733 | 3.380  | 2.827  | H | 0.918  | 8.431 | 8.581  |
| H | -1.170 | 1.727  | 2.448  | C | 0.816  | 6.568 | 7.576  |
| N | 0.899  | 2.188  | 2.310  | O | 1.382  | 5.480 | 7.968  |
| H | 1.391  | 1.854  | 1.464  | O | 0.692  | 6.857 | 6.353  |
| C | 1.713  | 2.896  | 3.104  | C | 2.794  | 2.558 | 13.880 |
| N | 1.266  | 3.510  | 4.189  | O | 3.482  | 2.877 | 14.856 |
| H | 1.859  | 4.160  | 4.724  | N | 3.310  | 2.248 | 12.671 |
| H | 0.332  | 3.353  | 4.535  | H | 2.695  | 2.034 | 11.893 |
| N | 3.035  | 2.954  | 2.775  | C | 4.737  | 2.285 | 12.424 |
| H | 3.450  | 3.897  | 2.967  | H | 4.942  | 1.723 | 11.509 |
| H | 3.167  | 2.652  | 1.797  | H | 5.275  | 1.813 | 13.249 |
| C | 0.780  | 11.102 | 5.862  | C | 5.339  | 3.687 | 12.277 |
| H | 0.903  | 11.262 | 4.789  | O | 6.543  | 3.855 | 12.417 |
| H | 0.752  | 12.073 | 6.363  | N | 4.448  | 4.682 | 11.986 |
| N | 2.323  | 10.458 | 7.738  | H | 3.476  | 4.429 | 11.853 |
| C | 1.901  | 10.279 | 6.431  | C | 4.840  | 6.079 | 11.885 |
| C | 3.250  | 9.544  | 7.958  | H | 5.932  | 6.101 | 11.914 |
| H | 3.792  | 9.405  | 8.880  | C | 4.324  | 6.763 | 10.621 |
| N | 3.469  | 8.789  | 6.848  | H | 3.239  | 6.683 | 10.522 |



|           |        |        |        |   |        |        |        |
|-----------|--------|--------|--------|---|--------|--------|--------|
| H         | 4.567  | 7.834  | 10.648 | H | 11.388 | 2.736  | 8.867  |
| C         | 4.982  | 6.219  | 9.349  | C | 11.101 | 0.686  | 9.451  |
| O         | 6.187  | 5.921  | 9.358  | H | 12.142 | 0.425  | 9.287  |
| O         | 4.213  | 6.150  | 8.322  | C | 10.196 | -0.291 | 9.872  |
| Mg        | 3.254  | 4.796  | 7.374  | H | 10.525 | -1.317 | 10.009 |
| C         | 2.804  | 1.866  | 8.671  | C | 8.444  | 1.374  | 9.876  |
| O         | 3.798  | 0.998  | 6.674  | H | 7.412  | 1.655  | 10.078 |
| O         | 2.581  | 1.528  | 9.851  | C | 8.868  | 0.063  | 10.113 |
| C         | 3.000  | 0.706  | 7.681  | H | 8.160  | -0.678 | 10.481 |
| O         | 2.882  | 3.027  | 8.183  | C | -0.777 | 3.061  | 0.688  |
| C         | 2.340  | -0.499 | 7.806  | H | 0.002  | 3.752  | 0.352  |
| H         | 2.764  | -1.367 | 7.312  | H | -1.716 | 3.622  | 0.673  |
| H         | 1.807  | -0.680 | 8.732  | C | -0.508 | 2.616  | 2.124  |
| C         | 0.778  | -0.501 | 6.344  | H | -0.705 | 3.461  | 2.789  |
| O         | 0.471  | -1.665 | 6.330  | H | -1.187 | 1.812  | 2.435  |
| O         | 0.615  | 0.592  | 5.883  | N | 0.897  | 2.211  | 2.305  |
| H         | 3.814  | 0.258  | 6.011  | H | 1.390  | 1.878  | 1.458  |
| O         | 2.664  | 5.478  | 5.498  | C | 1.721  | 2.905  | 3.107  |
| H         | 1.867  | 6.106  | 5.647  | N | 1.277  | 3.515  | 4.195  |
| H         | 3.140  | 5.661  | 4.648  | H | 1.872  | 4.162  | 4.741  |
| O         | 4.982  | 4.238  | 6.296  | H | 0.322  | 3.412  | 4.500  |
| H         | 5.379  | 5.102  | 6.053  | N | 3.043  | 2.940  | 2.788  |
| H         | 5.722  | 3.662  | 6.562  | H | 3.471  | 3.876  | 2.985  |
|           |        |        |        | H | 3.183  | 2.631  | 1.814  |
| <b>IM</b> |        |        |        | C | 0.785  | 11.101 | 5.872  |
| C         | 6.660  | 7.816  | 5.334  | H | 0.925  | 11.244 | 4.798  |
| H         | 6.193  | 8.807  | 5.378  | H | 0.749  | 12.079 | 6.358  |
| H         | 7.288  | 7.779  | 4.435  | N | 2.302  | 10.508 | 7.783  |
| O         | 5.653  | 6.798  | 5.297  | C | 1.899  | 10.291 | 6.476  |
| H         | 5.178  | 6.960  | 4.439  | C | 3.221  | 9.597  | 8.044  |
| C         | 8.797  | 3.740  | 9.078  | H | 3.750  | 9.484  | 8.977  |
| H         | 9.300  | 4.497  | 9.691  | N | 3.453  | 8.807  | 6.961  |
| H         | 7.735  | 3.803  | 9.331  | H | 4.059  | 7.993  | 6.947  |
| C         | 9.329  | 2.351  | 9.394  | C | 2.618  | 9.241  | 5.952  |
| C         | 10.675 | 1.993  | 9.214  | H | 2.596  | 8.768  | 4.986  |

|   |        |       |        |                             |        |        |        |
|---|--------|-------|--------|-----------------------------|--------|--------|--------|
| C | -2.533 | 4.496 | 7.252  | O                           | 4.251  | 6.134  | 8.317  |
| H | -1.950 | 5.282 | 7.737  | Mg                          | 3.288  | 4.749  | 7.404  |
| H | -3.269 | 4.126 | 7.973  | C                           | 2.877  | 1.865  | 8.787  |
| C | -1.684 | 3.294 | 6.881  | O                           | 3.830  | 0.995  | 6.747  |
| O | -2.207 | 2.225 | 6.509  | O                           | 2.639  | 1.591  | 9.983  |
| N | -0.344 | 3.411 | 6.997  | C                           | 3.094  | 0.684  | 7.843  |
| H | 0.204  | 2.567 | 6.892  | O                           | 2.928  | 3.022  | 8.261  |
| H | 0.144  | 4.216 | 7.405  | C                           | 2.588  | -0.532 | 8.111  |
| C | 0.178  | 6.961 | 10.021 | H                           | 2.790  | -1.388 | 7.475  |
| H | 1.152  | 6.662 | 10.406 | H                           | 2.011  | -0.684 | 9.014  |
| H | -0.430 | 6.054 | 9.966  | C                           | 0.550  | -0.631 | 5.794  |
| C | 0.278  | 7.552 | 8.614  | O                           | 0.483  | -1.787 | 5.982  |
| H | -0.694 | 7.886 | 8.229  | O                           | 0.578  | 0.508  | 5.543  |
| H | 0.927  | 8.435 | 8.588  | H                           | 3.784  | 0.254  | 6.101  |
| C | 0.837  | 6.568 | 7.588  | O                           | 2.667  | 5.444  | 5.519  |
| O | 1.407  | 5.486 | 7.989  | H                           | 1.880  | 6.085  | 5.674  |
| O | 0.712  | 6.848 | 6.362  | H                           | 3.160  | 5.642  | 4.684  |
| C | 2.739  | 2.602 | 13.962 | O                           | 4.981  | 4.219  | 6.273  |
| O | 3.389  | 2.942 | 14.958 | H                           | 5.380  | 5.082  | 6.034  |
| N | 3.304  | 2.275 | 12.782 | H                           | 5.726  | 3.618  | 6.468  |
| H | 2.728  | 2.052 | 11.975 |                             |        |        |        |
| C | 4.743  | 2.329 | 12.605 | <b>R'</b> <sub>pyrone</sub> |        |        |        |
| H | 4.985  | 1.814 | 11.671 | C                           | 6.581  | 7.870  | 5.194  |
| H | 5.250  | 1.824 | 13.429 | H                           | 6.038  | 8.818  | 5.295  |
| C | 5.315  | 3.751 | 12.555 | H                           | 7.181  | 7.919  | 4.276  |
| O | 6.442  | 3.994 | 12.959 | O                           | 5.673  | 6.773  | 5.156  |
| N | 4.473  | 4.692 | 12.021 | H                           | 5.122  | 6.917  | 4.342  |
| H | 3.547  | 4.404 | 11.729 | C                           | 9.144  | 3.906  | 8.707  |
| C | 4.844  | 6.093 | 11.905 | H                           | 9.311  | 4.787  | 9.335  |
| H | 5.934  | 6.140 | 11.949 | H                           | 8.103  | 3.620  | 8.874  |
| C | 4.325  | 6.736 | 10.621 | C                           | 10.119 | 2.812  | 9.098  |
| H | 3.243  | 6.628 | 10.512 | C                           | 11.237 | 3.130  | 9.878  |
| H | 4.537  | 7.813 | 10.627 | H                           | 11.393 | 4.155  | 10.194 |
| C | 5.004  | 6.191 | 9.359  | C                           | 12.164 | 2.155  | 10.237 |
| O | 6.206  | 5.886 | 9.384  | H                           | 13.027 | 2.442  | 10.829 |

|   |        |        |        |    |        |       |        |
|---|--------|--------|--------|----|--------|-------|--------|
| C | 11.978 | 0.828  | 9.844  | C  | -1.940 | 3.690 | 6.120  |
| H | 12.707 | 0.065  | 10.103 | O  | -2.348 | 2.571 | 5.766  |
| C | 9.925  | 1.466  | 8.743  | N  | -0.748 | 4.191 | 5.739  |
| H | 9.059  | 1.185  | 8.148  | H  | -0.111 | 3.591 | 5.237  |
| C | 10.843 | 0.483  | 9.112  | H  | -0.389 | 5.085 | 6.081  |
| H | 10.686 | -0.546 | 8.800  | C  | 0.156  | 7.025 | 10.176 |
| C | -0.394 | 3.264  | 0.648  | H  | 1.145  | 6.743 | 10.535 |
| H | 0.339  | 3.917  | 0.163  | H  | -0.437 | 6.108 | 10.123 |
| H | -1.326 | 3.838  | 0.709  | C  | 0.214  | 7.642 | 8.776  |
| C | 0.041  | 2.955  | 2.077  | H  | -0.772 | 7.945 | 8.408  |
| H | -0.106 | 3.852  | 2.691  | H  | 0.846  | 8.538 | 8.759  |
| H | -0.597 | 2.185  | 2.526  | C  | 0.793  | 6.663 | 7.755  |
| N | 1.468  | 2.594  | 2.183  | O  | 1.666  | 5.837 | 8.158  |
| H | 2.050  | 2.471  | 1.331  | O  | 0.375  | 6.732 | 6.554  |
| C | 2.061  | 2.508  | 3.374  | C  | 2.520  | 2.706 | 14.277 |
| N | 1.374  | 2.136  | 4.455  | O  | 3.083  | 3.072 | 15.314 |
| H | 1.774  | 2.307  | 5.381  | N  | 3.183  | 2.394 | 13.140 |
| H | 0.519  | 1.568  | 4.389  | H  | 2.680  | 2.262 | 12.260 |
| N | 3.378  | 2.832  | 3.494  | C  | 4.625  | 2.562 | 13.045 |
| H | 3.753  | 2.740  | 4.437  | H  | 4.944  | 2.001 | 12.167 |
| H | 3.577  | 3.781  | 3.106  | H  | 5.108  | 2.162 | 13.940 |
| C | 0.745  | 11.043 | 5.869  | C  | 5.100  | 4.015 | 12.963 |
| H | 0.874  | 11.098 | 4.786  | O  | 5.908  | 4.458 | 13.779 |
| H | 0.729  | 12.056 | 6.280  | N  | 4.526  | 4.773 | 11.984 |
| N | 2.276  | 10.623 | 7.804  | H  | 3.987  | 4.328 | 11.241 |
| C | 1.852  | 10.272 | 6.533  | C  | 4.874  | 6.185 | 11.779 |
| C | 3.178  | 9.724  | 8.152  | H  | 5.960  | 6.296 | 11.858 |
| H | 3.710  | 9.698  | 9.089  | C  | 4.393  | 6.694 | 10.419 |
| N | 3.385  | 8.817  | 7.162  | H  | 3.338  | 6.465 | 10.241 |
| H | 3.953  | 7.974  | 7.261  | H  | 4.485  | 7.787 | 10.376 |
| C | 2.544  | 9.154  | 6.120  | C  | 5.195  | 6.182 | 9.205  |
| H | 2.513  | 8.583  | 5.209  | O  | 6.368  | 5.781 | 9.338  |
| C | -2.823 | 4.621  | 6.934  | O  | 4.575  | 6.259 | 8.082  |
| H | -2.234 | 5.325  | 7.528  | Mg | 3.268  | 4.906 | 7.372  |
| H | -3.439 | 4.014  | 7.600  | C  | 2.826  | 2.646 | 9.340  |

|   |        |        |        |                             |        |        |        |
|---|--------|--------|--------|-----------------------------|--------|--------|--------|
| O | 2.668  | 1.911  | 10.339 | H                           | 2.901  | 5.568  | 4.575  |
| O | 3.398  | 3.771  | 9.257  | O                           | 4.882  | 4.304  | 6.164  |
| C | 2.302  | 2.121  | 7.978  | H                           | 5.381  | 5.128  | 5.995  |
| O | 2.393  | 2.887  | 7.013  | H                           | 5.479  | 3.536  | 6.123  |
| C | 1.767  | 0.736  | 7.831  |                             |        |        |        |
| H | 1.998  | 0.152  | 8.724  | <b>R''<sub>pyrone</sub></b> |        |        |        |
| O | -0.227 | -0.323 | 7.027  | C                           | 6.734  | 7.880  | 5.184  |
| C | 0.220  | 0.724  | 7.623  | H                           | 6.322  | 8.897  | 5.211  |
| O | -0.427 | 1.688  | 8.028  | H                           | 7.387  | 7.815  | 4.305  |
| H | 2.222  | 0.273  | 6.953  | O                           | 5.680  | 6.915  | 5.106  |
| C | 4.542  | -1.120 | 7.965  | H                           | 5.291  | 7.049  | 4.198  |
| O | 4.637  | -0.298 | 6.897  | C                           | 9.117  | 3.763  | 8.845  |
| C | 5.188  | 0.998  | 6.958  | H                           | 9.413  | 4.596  | 9.494  |
| O | 5.087  | 1.638  | 5.927  | H                           | 8.061  | 3.581  | 9.062  |
| C | 5.768  | 1.377  | 8.207  | C                           | 9.949  | 2.528  | 9.153  |
| H | 6.249  | 2.344  | 8.241  | C                           | 11.328 | 2.475  | 8.906  |
| C | 3.817  | -2.375 | 7.639  | H                           | 11.827 | 3.328  | 8.463  |
| H | 2.789  | -2.137 | 7.347  | C                           | 12.064 | 1.332  | 9.202  |
| H | 3.808  | -3.054 | 8.487  | H                           | 13.129 | 1.327  | 8.999  |
| H | 4.294  | -2.880 | 6.795  | C                           | 11.437 | 0.202  | 9.729  |
| C | 5.669  | 0.545  | 9.295  | H                           | 12.013 | -0.700 | 9.918  |
| O | 6.155  | 0.783  | 10.519 | C                           | 9.339  | 1.405  | 9.727  |
| C | 6.993  | 1.941  | 10.732 | H                           | 8.283  | 1.444  | 9.978  |
| H | 7.915  | 1.831  | 10.162 | C                           | 10.071 | 0.248  | 10.005 |
| H | 6.470  | 2.864  | 10.463 | H                           | 9.569  | -0.615 | 10.438 |
| H | 7.223  | 1.942  | 11.796 | C                           | -0.687 | 3.089  | 0.656  |
| C | 5.013  | -0.734 | 9.175  | H                           | 0.040  | 3.811  | 0.270  |
| C | 4.915  | -1.653 | 10.352 | H                           | -1.646 | 3.613  | 0.721  |
| O | 5.568  | -2.691 | 10.346 | C                           | -0.284 | 2.630  | 2.055  |
| C | 3.943  | -1.300 | 11.445 | H                           | -0.434 | 3.450  | 2.762  |
| H | 3.760  | -0.226 | 11.501 | H                           | -0.920 | 1.812  | 2.413  |
| H | 2.986  | -1.778 | 11.193 | N                           | 1.139  | 2.255  | 2.110  |
| H | 4.261  | -1.713 | 12.405 | H                           | 1.583  | 2.026  | 1.209  |
| O | 2.548  | 5.522  | 5.493  | C                           | 1.984  | 2.939  | 2.910  |
| H | 1.723  | 6.053  | 5.603  | N                           | 1.547  | 3.399  | 4.085  |

|   |        |        |        |    |        |        |        |
|---|--------|--------|--------|----|--------|--------|--------|
| H | 2.183  | 3.899  | 4.704  | N  | 2.931  | 2.598  | 13.570 |
| H | 0.805  | 2.836  | 4.520  | H  | 2.382  | 2.452  | 12.726 |
| N | 3.237  | 3.140  | 2.491  | C  | 4.382  | 2.578  | 13.430 |
| H | 3.681  | 4.048  | 2.769  | H  | 4.624  | 2.005  | 12.532 |
| H | 3.368  | 2.883  | 1.506  | H  | 4.844  | 2.105  | 14.294 |
| C | 0.784  | 10.968 | 5.891  | C  | 4.985  | 3.984  | 13.329 |
| H | 0.794  | 11.160 | 4.815  | O  | 5.762  | 4.421  | 14.174 |
| H | 0.843  | 11.924 | 6.418  | N  | 4.519  | 4.739  | 12.286 |
| N | 2.462  | 10.104 | 7.562  | H  | 3.947  | 4.298  | 11.567 |
| C | 1.936  | 10.089 | 6.282  | C  | 4.970  | 6.113  | 12.037 |
| C | 3.426  | 9.198  | 7.570  | H  | 6.057  | 6.160  | 12.154 |
| H | 4.057  | 8.953  | 8.411  | C  | 4.577  | 6.591  | 10.637 |
| N | 3.561  | 8.608  | 6.352  | H  | 3.508  | 6.454  | 10.444 |
| H | 4.266  | 7.920  | 6.082  | H  | 4.783  | 7.665  | 10.542 |
| C | 2.615  | 9.168  | 5.520  | C  | 5.386  | 5.926  | 9.506  |
| H | 2.511  | 8.874  | 4.489  | O  | 6.611  | 5.760  | 9.625  |
| C | -2.832 | 4.709  | 7.505  | O  | 4.732  | 5.615  | 8.445  |
| H | -2.359 | 5.524  | 8.062  | Mg | 3.158  | 4.514  | 8.045  |
| H | -3.522 | 4.185  | 8.169  | C  | 2.356  | 2.446  | 9.961  |
| C | -1.795 | 3.716  | 7.033  | O  | 3.062  | 3.485  | 9.882  |
| O | -2.054 | 2.497  | 6.956  | O  | 2.146  | 1.739  | 10.978 |
| N | -0.595 | 4.202  | 6.687  | C  | 1.626  | 2.059  | 8.644  |
| H | 0.124  | 3.525  | 6.462  | O  | 1.832  | 2.771  | 7.662  |
| H | -0.321 | 5.185  | 6.728  | C  | 0.661  | 0.923  | 8.627  |
| C | 0.073  | 7.026  | 10.429 | H  | 0.077  | 0.952  | 9.554  |
| H | 1.006  | 6.675  | 10.870 | H  | -0.019 | 1.032  | 7.782  |
| H | -0.573 | 6.151  | 10.312 | C  | 1.280  | -0.520 | 8.628  |
| C | 0.308  | 7.648  | 9.050  | O  | 2.356  | -0.722 | 9.221  |
| H | -0.621 | 7.984  | 8.575  | O  | 0.547  | -1.375 | 8.051  |
| H | 0.968  | 8.524  | 9.094  | C  | 2.800  | -2.653 | 6.172  |
| C | 0.970  | 6.642  | 8.117  | C  | 3.736  | -2.485 | 7.159  |
| O | 1.696  | 5.744  | 8.640  | C  | 4.448  | -1.215 | 7.180  |
| O | 0.747  | 6.728  | 6.864  | C  | 4.225  | -0.263 | 6.218  |
| C | 2.338  | 2.835  | 14.754 | C  | 3.320  | -0.490 | 5.151  |
| O | 2.965  | 2.982  | 15.810 | O  | 2.607  | -1.717 | 5.215  |

|                              |        |        |       |   |        |        |       |
|------------------------------|--------|--------|-------|---|--------|--------|-------|
| O                            | 3.060  | 0.212  | 4.191 | H | 11.680 | 3.205  | 9.091 |
| H                            | 4.731  | 0.688  | 6.227 | C | 11.805 | 1.087  | 9.425 |
| C                            | 1.873  | -3.799 | 5.932 | H | 12.889 | 1.095  | 9.470 |
| H                            | 0.869  | -3.516 | 6.264 | C | 11.106 | -0.113 | 9.567 |
| H                            | 2.169  | -4.694 | 6.474 | H | 11.646 | -1.047 | 9.704 |
| H                            | 1.820  | -3.994 | 4.857 | C | 9.034  | 1.099  | 9.304 |
| O                            | 5.304  | -1.049 | 8.188 | H | 7.948  | 1.107  | 9.281 |
| C                            | 6.113  | 0.147  | 8.251 | C | 9.712  | -0.101 | 9.523 |
| H                            | 6.775  | 0.211  | 7.385 | H | 9.151  | -1.024 | 9.657 |
| H                            | 5.489  | 1.042  | 8.308 | C | -0.724 | 3.077  | 0.696 |
| H                            | 6.705  | 0.038  | 9.157 | H | -0.006 | 3.815  | 0.323 |
| C                            | 3.970  | -3.536 | 8.189 | H | -1.689 | 3.590  | 0.774 |
| O                            | 3.070  | -4.304 | 8.538 | C | -0.315 | 2.588  | 2.083 |
| C                            | 5.335  | -3.713 | 8.806 | H | -0.517 | 3.373  | 2.815 |
| H                            | 6.149  | -3.443 | 8.138 | H | -0.901 | 1.722  | 2.406 |
| H                            | 5.418  | -3.086 | 9.699 | N | 1.124  | 2.285  | 2.146 |
| H                            | 5.433  | -4.756 | 9.111 | H | 1.587  | 2.076  | 1.248 |
| O                            | 2.801  | 5.192  | 6.066 | C | 1.936  | 2.983  | 2.965 |
| H                            | 2.061  | 5.863  | 6.185 | N | 1.478  | 3.426  | 4.137 |
| H                            | 3.531  | 5.616  | 5.586 | H | 2.075  | 3.957  | 4.773 |
| O                            | 4.686  | 3.198  | 7.446 | H | 0.672  | 2.931  | 4.532 |
| H                            | 5.419  | 3.792  | 7.692 | N | 3.200  | 3.193  | 2.570 |
| H                            | 4.830  | 3.003  | 6.486 | H | 3.636  | 4.107  | 2.841 |
|                              |        |        |       | H | 3.345  | 2.938  | 1.588 |
| <b>TS''<sub>pyrone</sub></b> |        |        |       | C | 0.789  | 10.955 | 5.923 |
| C                            | 6.748  | 7.830  | 5.235 | H | 0.791  | 11.157 | 4.849 |
| H                            | 6.345  | 8.851  | 5.266 | H | 0.859  | 11.906 | 6.457 |
| H                            | 7.402  | 7.764  | 4.356 | N | 2.486  | 10.069 | 7.567 |
| O                            | 5.685  | 6.876  | 5.148 | C | 1.940  | 10.065 | 6.294 |
| H                            | 5.302  | 7.016  | 4.239 | C | 3.444  | 9.156  | 7.551 |
| C                            | 8.956  | 3.590  | 8.850 | H | 4.093  | 8.904  | 8.376 |
| H                            | 9.256  | 4.377  | 9.550 | N | 3.555  | 8.573  | 6.328 |
| H                            | 7.884  | 3.441  | 9.005 | H | 4.258  | 7.888  | 6.046 |
| C                            | 9.723  | 2.305  | 9.124 | C | 2.601  | 9.147  | 5.514 |
| C                            | 11.123 | 2.282  | 9.208 | H | 2.482  | 8.864  | 4.482 |

|   |        |       |        |    |        |        |        |
|---|--------|-------|--------|----|--------|--------|--------|
| C | -2.841 | 4.654 | 7.526  | O  | 4.654  | 5.582  | 8.462  |
| H | -2.388 | 5.466 | 8.102  | Mg | 3.069  | 4.398  | 8.106  |
| H | -3.560 | 4.135 | 8.163  | C  | 2.457  | 2.388  | 10.089 |
| C | -1.788 | 3.645 | 7.123  | O  | 3.150  | 3.442  | 9.973  |
| O | -2.074 | 2.434 | 7.004  | O  | 2.455  | 1.622  | 11.092 |
| N | -0.549 | 4.104 | 6.908  | C  | 1.567  | 2.049  | 8.881  |
| H | 0.221  | 3.435 | 6.897  | O  | 1.803  | 2.713  | 7.816  |
| H | -0.301 | 5.091 | 6.951  | C  | 0.611  | 1.043  | 9.046  |
| C | 0.026  | 7.017 | 10.490 | H  | 0.324  | 0.832  | 10.066 |
| H | 0.935  | 6.635 | 10.953 | H  | -0.180 | 0.965  | 8.303  |
| H | -0.639 | 6.161 | 10.336 | C  | 1.390  | -0.919 | 9.248  |
| C | 0.320  | 7.653 | 9.130  | O  | 2.584  | -0.897 | 9.180  |
| H | -0.581 | 8.030 | 8.635  | O  | 0.372  | -1.537 | 9.407  |
| H | 1.012  | 8.502 | 9.206  | C  | 2.814  | -3.265 | 5.706  |
| C | 0.967  | 6.631 | 8.204  | C  | 3.602  | -2.838 | 6.745  |
| O | 1.678  | 5.725 | 8.731  | C  | 4.216  | -1.529 | 6.605  |
| O | 0.735  | 6.709 | 6.951  | C  | 3.982  | -0.761 | 5.485  |
| C | 2.254  | 2.922 | 14.845 | C  | 3.358  | -1.332 | 4.338  |
| O | 2.815  | 3.191 | 15.916 | O  | 2.731  | -2.577 | 4.549  |
| N | 2.919  | 2.633 | 13.713 | O  | 3.285  | -0.878 | 3.210  |
| H | 2.433  | 2.374 | 12.856 | H  | 4.413  | 0.220  | 5.360  |
| C | 4.373  | 2.634 | 13.678 | C  | 1.952  | -4.477 | 5.640  |
| H | 4.689  | 1.945 | 12.896 | H  | 0.910  | -4.174 | 5.793  |
| H | 4.771  | 2.294 | 14.633 | H  | 2.210  | -5.213 | 6.397  |
| C | 4.986  | 4.021 | 13.451 | H  | 2.024  | -4.907 | 4.638  |
| O | 5.789  | 4.495 | 14.254 | O  | 4.965  | -1.144 | 7.628  |
| N | 4.511  | 4.715 | 12.374 | C  | 5.514  | 0.183  | 7.657  |
| H | 3.938  | 4.240 | 11.677 | H  | 6.127  | 0.385  | 6.779  |
| C | 4.926  | 6.093 | 12.071 | H  | 4.719  | 0.926  | 7.734  |
| H | 6.013  | 6.171 | 12.167 | H  | 6.143  | 0.205  | 8.543  |
| C | 4.494  | 6.525 | 10.665 | C  | 3.830  | -3.678 | 7.958  |
| H | 3.430  | 6.345 | 10.489 | O  | 2.950  | -4.416 | 8.408  |
| H | 4.656  | 7.606 | 10.550 | C  | 5.184  | -3.673 | 8.621  |
| C | 5.309  | 5.878 | 9.526  | H  | 5.991  | -3.386 | 7.953  |
| O | 6.537  | 5.718 | 9.641  | H  | 5.164  | -2.965 | 9.455  |

|                              |        |        |       |   |        |        |        |
|------------------------------|--------|--------|-------|---|--------|--------|--------|
| H                            | 5.369  | -4.670 | 9.024 | H | 1.585  | 2.073  | 1.265  |
| O                            | 2.710  | 5.147  | 6.130 | C | 1.939  | 2.996  | 2.973  |
| H                            | 1.978  | 5.827  | 6.287 | N | 1.490  | 3.439  | 4.147  |
| H                            | 3.455  | 5.599  | 5.703 | H | 2.084  | 3.990  | 4.772  |
| O                            | 4.706  | 3.244  | 7.431 | H | 0.701  | 2.932  | 4.559  |
| H                            | 5.343  | 3.968  | 7.592 | N | 3.196  | 3.213  | 2.562  |
| H                            | 4.831  | 2.960  | 6.493 | H | 3.633  | 4.127  | 2.832  |
|                              |        |        |       | H | 3.330  | 2.962  | 1.577  |
| <b>IM''<sub>pyrone</sub></b> |        |        |       | C | 0.791  | 10.986 | 5.898  |
| C                            | 6.756  | 7.836  | 5.223 | H | 0.794  | 11.185 | 4.823  |
| H                            | 6.357  | 8.859  | 5.255 | H | 0.856  | 11.938 | 6.430  |
| H                            | 7.415  | 7.771  | 4.348 | N | 2.485  | 10.106 | 7.547  |
| O                            | 5.690  | 6.888  | 5.126 | C | 1.945  | 10.101 | 6.273  |
| H                            | 5.311  | 7.035  | 4.217 | C | 3.442  | 9.192  | 7.538  |
| C                            | 8.914  | 3.557  | 8.827 | H | 4.083  | 8.935  | 8.368  |
| H                            | 9.197  | 4.330  | 9.549 | N | 3.561  | 8.610  | 6.316  |
| H                            | 7.838  | 3.407  | 8.951 | H | 4.258  | 7.916  | 6.044  |
| C                            | 9.674  | 2.267  | 9.094 | C | 2.611  | 9.182  | 5.497  |
| C                            | 11.050 | 2.261  | 9.362 | H | 2.493  | 8.895  | 4.466  |
| H                            | 11.590 | 3.200  | 9.402 | C | -2.843 | 4.686  | 7.487  |
| C                            | 11.732 | 1.062  | 9.564 | H | -2.402 | 5.493  | 8.080  |
| H                            | 12.801 | 1.082  | 9.750 | H | -3.560 | 4.149  | 8.111  |
| C                            | 11.056 | -0.159 | 9.513 | C | -1.775 | 3.696  | 7.071  |
| H                            | 11.599 | -1.092 | 9.642 | O | -2.062 | 2.485  | 6.926  |
| C                            | 9.002  | 1.036  | 9.070 | N | -0.542 | 4.172  | 6.879  |
| H                            | 7.935  | 1.026  | 8.871 | H | 0.273  | 3.545  | 6.913  |
| C                            | 9.681  | -0.165 | 9.278 | H | -0.328 | 5.166  | 6.942  |
| H                            | 9.135  | -1.107 | 9.230 | C | 0.025  | 7.052  | 10.431 |
| C                            | -0.722 | 3.076  | 0.709 | H | 0.939  | 6.666  | 10.881 |
| H                            | -0.002 | 3.813  | 0.337 | H | -0.636 | 6.195  | 10.261 |
| H                            | -1.686 | 3.589  | 0.786 | C | 0.311  | 7.721  | 9.084  |
| C                            | -0.313 | 2.587  | 2.099 | H | -0.599 | 8.073  | 8.587  |
| H                            | -0.516 | 3.372  | 2.831 | H | 0.974  | 8.590  | 9.182  |
| H                            | -0.899 | 1.720  | 2.420 | C | 1.006  | 6.734  | 8.152  |
| N                            | 1.125  | 2.284  | 2.163 | O | 1.790  | 5.890  | 8.674  |



|    |        |        |        |   |       |        |       |
|----|--------|--------|--------|---|-------|--------|-------|
| O  | 0.742  | 6.783  | 6.903  | C | 3.919 | -0.747 | 5.437 |
| C  | 2.197  | 2.966  | 14.786 | C | 3.297 | -1.333 | 4.295 |
| O  | 2.750  | 3.249  | 15.859 | O | 2.658 | -2.573 | 4.523 |
| N  | 2.873  | 2.669  | 13.662 | O | 3.238 | -0.898 | 3.161 |
| H  | 2.399  | 2.424  | 12.794 | H | 4.341 | 0.236  | 5.303 |
| C  | 4.327  | 2.665  | 13.662 | C | 1.868 | -4.452 | 5.648 |
| H  | 4.662  | 1.947  | 12.916 | H | 0.831 | -4.144 | 5.821 |
| H  | 4.690  | 2.355  | 14.640 | H | 2.139 | -5.187 | 6.401 |
| C  | 4.961  | 4.040  | 13.419 | H | 1.915 | -4.888 | 4.648 |
| O  | 5.773  | 4.503  | 14.220 | O | 4.877 | -1.092 | 7.596 |
| N  | 4.495  | 4.738  | 12.341 | C | 5.357 | 0.264  | 7.632 |
| H  | 3.930  | 4.267  | 11.631 | H | 6.003 | 0.484  | 6.781 |
| C  | 4.926  | 6.114  | 12.046 | H | 4.524 | 0.968  | 7.656 |
| H  | 6.013  | 6.180  | 12.155 | H | 5.932 | 0.330  | 8.551 |
| C  | 4.517  | 6.554  | 10.637 | C | 3.756 | -3.634 | 7.939 |
| H  | 3.455  | 6.378  | 10.441 | O | 2.850 | -4.321 | 8.424 |
| H  | 4.680  | 7.636  | 10.530 | C | 5.121 | -3.661 | 8.576 |
| C  | 5.348  | 5.915  | 9.504  | H | 5.918 | -3.403 | 7.884 |
| O  | 6.565  | 5.699  | 9.661  | H | 5.139 | -2.941 | 9.400 |
| O  | 4.725  | 5.690  | 8.407  | H | 5.291 | -4.657 | 8.990 |
| Mg | 3.126  | 4.506  | 8.023  | O | 2.748 | 5.255  | 6.038 |
| C  | 2.473  | 2.471  | 9.949  | H | 2.003 | 5.915  | 6.211 |
| O  | 3.208  | 3.506  | 9.884  | H | 3.463 | 5.716  | 5.573 |
| O  | 2.464  | 1.673  | 10.934 | O | 4.788 | 3.350  | 7.371 |
| C  | 1.566  | 2.239  | 8.732  | H | 5.424 | 4.080  | 7.500 |
| O  | 1.849  | 2.954  | 7.678  | H | 4.890 | 3.036  | 6.442 |
| C  | 0.531  | 1.359  | 8.847  |   |       |        |       |
| H  | 0.341  | 0.875  | 9.794  |   |       |        |       |
| H  | -0.244 | 1.320  | 8.087  |   |       |        |       |
| C  | 1.530  | -1.326 | 9.463  |   |       |        |       |
| O  | 2.659  | -1.077 | 9.315  |   |       |        |       |
| O  | 0.413  | -1.644 | 9.627  |   |       |        |       |
| C  | 2.739  | -3.245 | 5.687  |   |       |        |       |
| C  | 3.536  | -2.810 | 6.716  |   |       |        |       |
| C  | 4.149  | -1.501 | 6.565  |   |       |        |       |
